# Supplementary material for: Bandgap engineering of MXene compounds for water splitting
Source: Royal Society of Chemistry journal article supplement (doi:10.1039/d3ta01933k), 2023-01-01

## **Bandgap Engineering of MXene Compounds for Water Splitting**

Diego Ontiveros, Francesc Viñes and Carmen Sousa\*

*Departament de Ciència de Materials i Química Física & Institut de Química Teòrica i Computacional (IQTCUB), Universitat de Barcelona, c/Martí i Franquès 1, 08028 Barcelona, Spain.*

\*E-mail: [c.sousa@ub.edu](mailto:c.sousa@ub.edu)

**Table S1** Bandgap values,  $E_g$ , comparison, with and without vdW correction using PBE0 or PBE0 with Grimme D3, of selected O-terminated MXenes, with stacking and O adatoms positions specified. All values are given in eV.

|                                                        | $E_g$ (PBE0) | $E_g$ (PBE0-D3) |
|--------------------------------------------------------|--------------|-----------------|
| <b>Zr<sub>2</sub>CO<sub>2</sub> ABC H<sub>M</sub></b>  | 2.262        | 2.262           |
| <b>Hf<sub>2</sub>CO<sub>2</sub> ABC H<sub>M</sub></b>  | 2.744        | 2.744           |
| <b>Sc<sub>2</sub>CO<sub>2</sub> ABC H<sub>MX</sub></b> | 3.786        | 3.786           |
| <b>Y<sub>2</sub>NO<sub>2</sub> ABC H<sub>MX</sub></b>  | 3.177        | 3.177           |
| <b>W<sub>2</sub>NO<sub>2</sub> ABC H<sub>M</sub></b>   | 0            | 0               |
| <b>Mo<sub>2</sub>NO<sub>2</sub> ABC H<sub>M</sub></b>  | 0            | 0               |

**Table S2** Comparison of the relative energy of different O-termination positions when using PBE without or with Grimme D3 dispersive forces correction, taking ABC H<sub>M</sub> structure as reference for the Zr<sub>2</sub>CO<sub>2</sub> ABC and W<sub>2</sub>NO<sub>2</sub> ABA structures.

| <b>Zr<sub>2</sub>CO<sub>2</sub> ABC</b> |                      |                       |                      |
|-----------------------------------------|----------------------|-----------------------|----------------------|
|                                         | <b>H<sub>M</sub></b> | <b>H<sub>MX</sub></b> | <b>H<sub>X</sub></b> |
| <b>PBE</b>                              | 0                    | 0.87                  | 1.96                 |
| <b>PBE-D3</b>                           | 0                    | 0.86                  | 1.94                 |

  

| <b>W<sub>2</sub>NO<sub>2</sub> ABA</b> |          |                       |                      |
|----------------------------------------|----------|-----------------------|----------------------|
|                                        | <b>H</b> | <b>H<sub>MX</sub></b> | <b>H<sub>X</sub></b> |
| <b>PBE</b>                             | -0.96    | -1.37                 | -1.64                |
| <b>PBE-D3</b>                          | -0.93    | -1.35                 | -1.54                |

**Table S3** Calculated lattice parameters,  $a$ , and MXene widths,  $d$ , for the studied pristine  $M_2X$  MXenes with ABC or ABA stacking. All values are given in Å.

| <i>M</i>  | <b>C</b>     |              |              |              | <b>N</b>     |              |              |              |
|-----------|--------------|--------------|--------------|--------------|--------------|--------------|--------------|--------------|
|           | <b>ABC</b>   |              | <b>ABA</b>   |              | <b>ABC</b>   |              | <b>ABA</b>   |              |
|           | <i>a</i> (Å) | <i>d</i> (Å) |
| <b>Sc</b> | 3.328        | 2.409        | 3.257        | 2.686        | 3.218        | 2.448        | 3.165        | 2.675        |
| <b>Y</b>  | 3.588        | 2.661        | 3.535        | 2.910        | 3.481        | 2.681        | 3.361        | 3.015        |
| <b>Ti</b> | 3.075        | 2.250        | 3.041        | 2.498        | 2.978        | 2.287        | 2.878        | 2.652        |
| <b>Zr</b> | 3.274        | 2.544        | 3.240        | 2.808        | 3.230        | 2.519        | 3.092        | 2.935        |
| <b>Hf</b> | 3.212        | 2.544        | 3.168        | 2.809        | 3.163        | 2.523        | 3.050        | 2.909        |
| <b>V</b>  | 2.900        | 2.174        | 2.765        | 2.563        | 2.867        | 2.125        | 2.690        | 2.598        |
| <b>Nb</b> | 3.130        | 2.388        | 2.975        | 2.819        | 3.131        | 2.308        | 2.913        | 2.875        |
| <b>Ta</b> | 3.084        | 2.436        | 2.965        | 2.811        | 3.082        | 2.363        | 2.888        | 2.905        |
| <b>Cr</b> | 2.807        | 2.112        | 2.638        | 2.521        | 2.821        | 2.066        | 2.606        | 2.498        |
| <b>Mo</b> | 2.925        | 2.512        | 2.850        | 2.742        | 2.804        | 2.815        | 2.817        | 2.773        |
| <b>W</b>  | 2.889        | 2.625        | 2.847        | 2.788        | 2.785        | 2.906        | 2.789        | 2.902        |

**Fig. S1** Total and projected DOS, calculated with PBE, for all  $M_2X$  systems, considering the two possible stackings, ABC and ABA. Energies corrected to  $E_F$ , indicated with a dashed black line. The particular  $M_2X$  compound and stacking are labelled on top of the image.

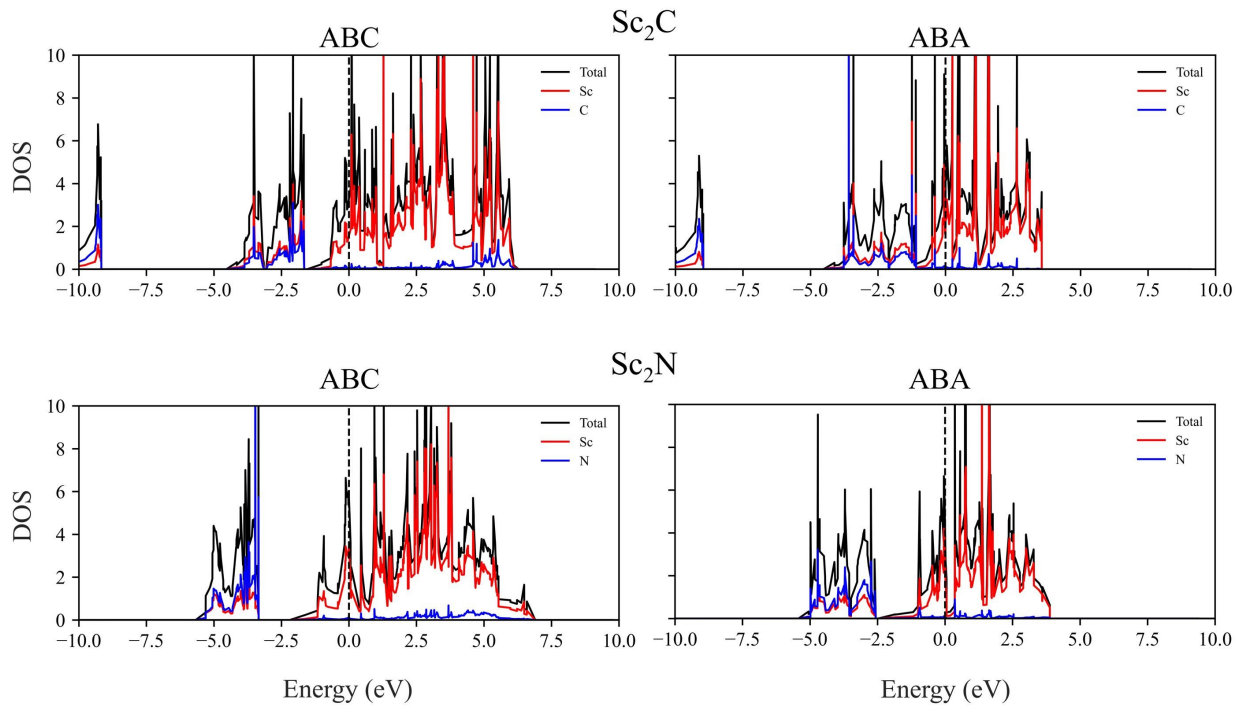

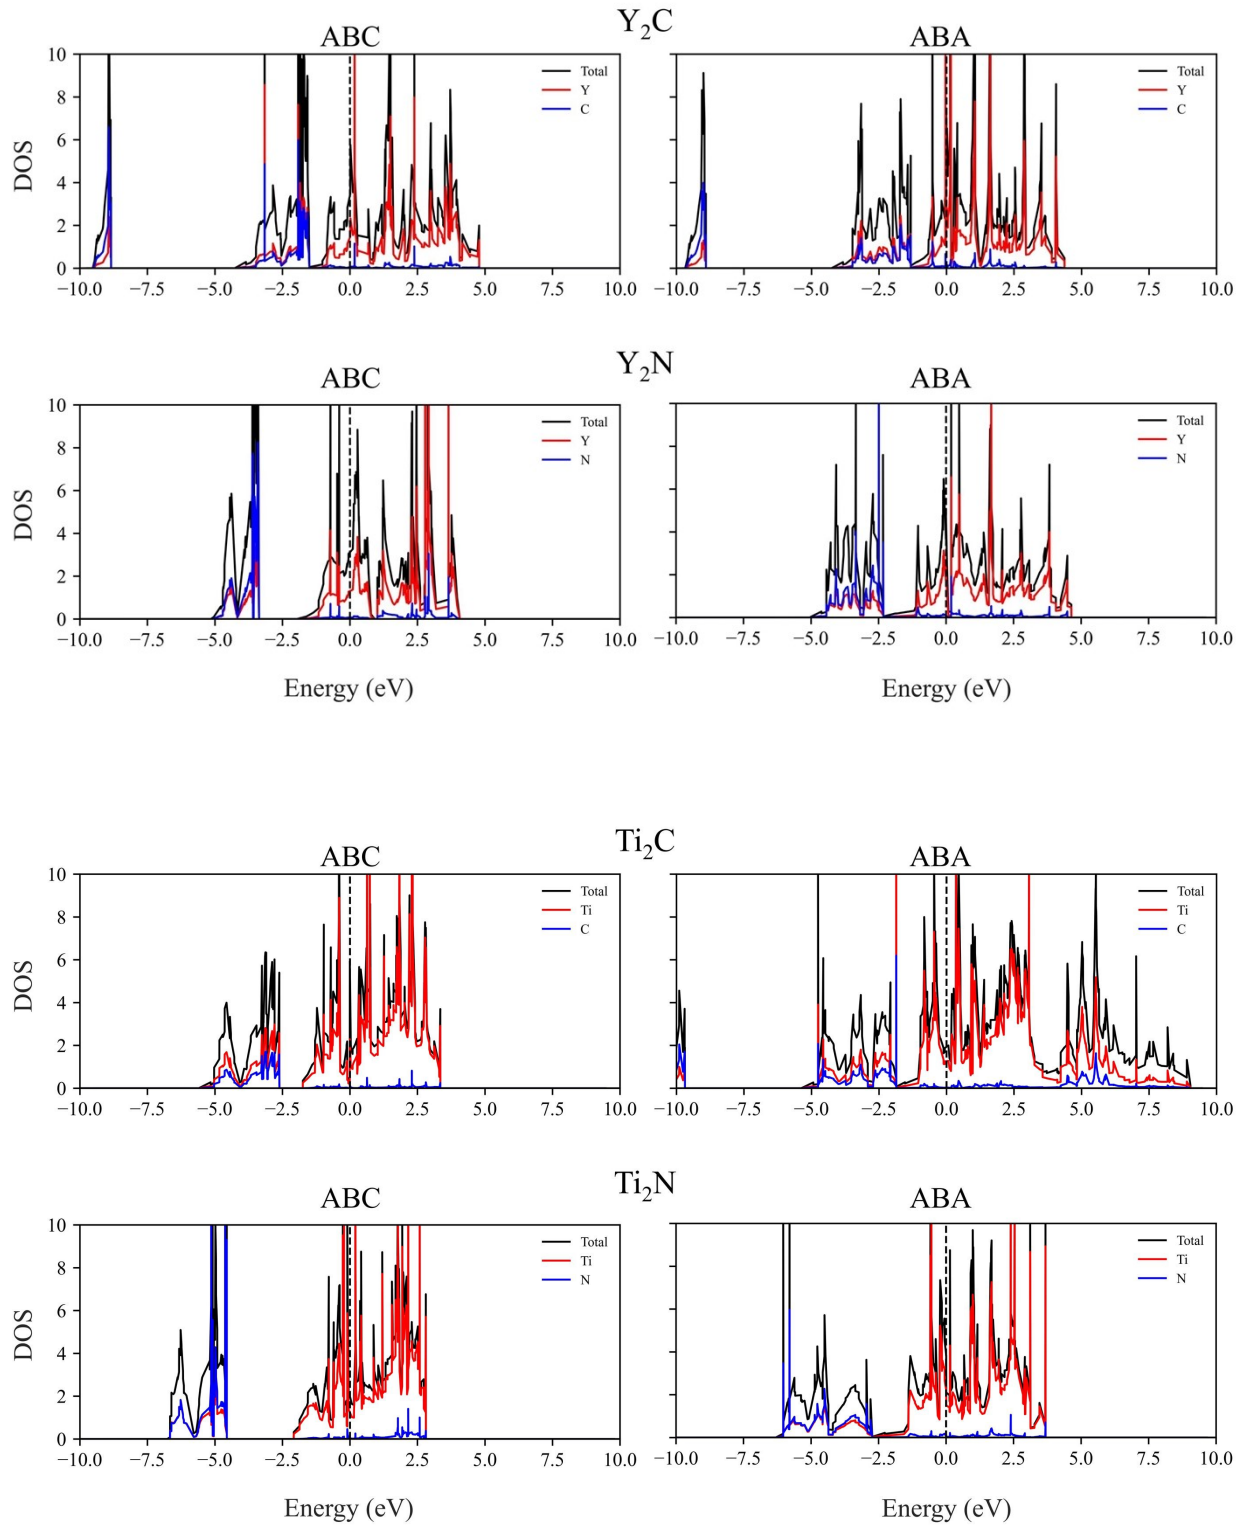

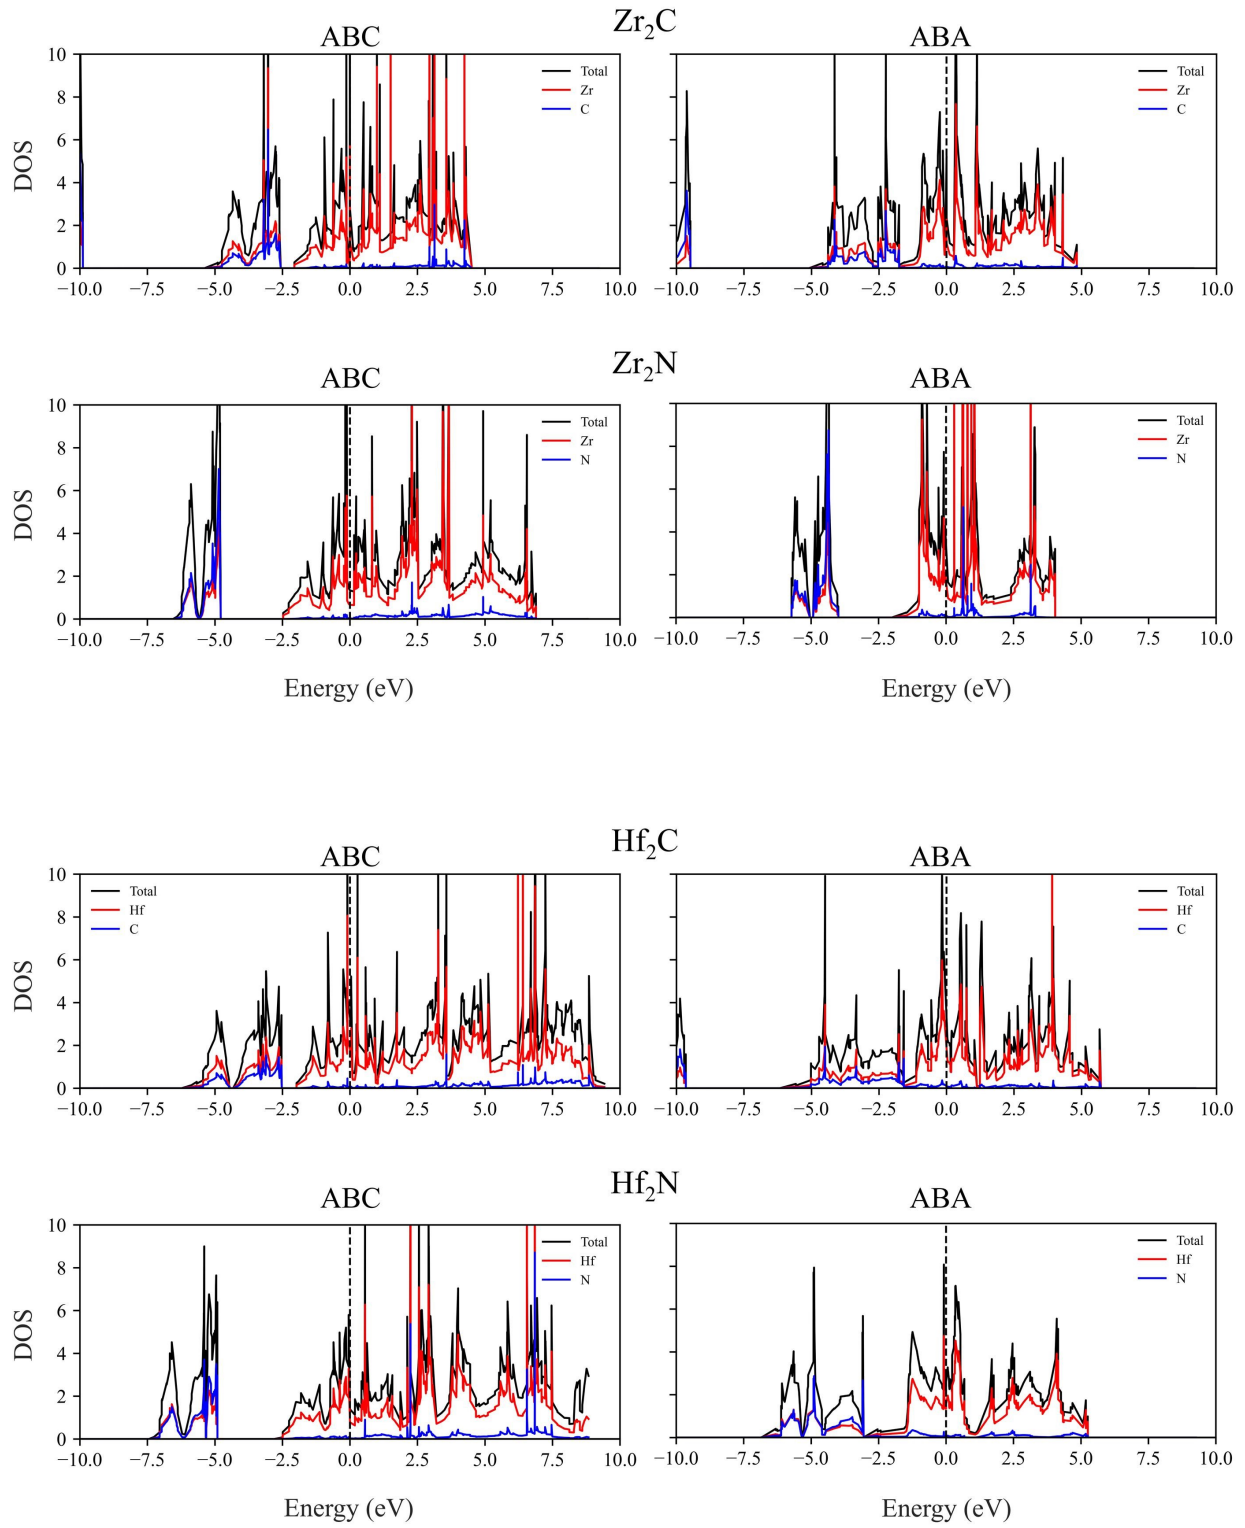

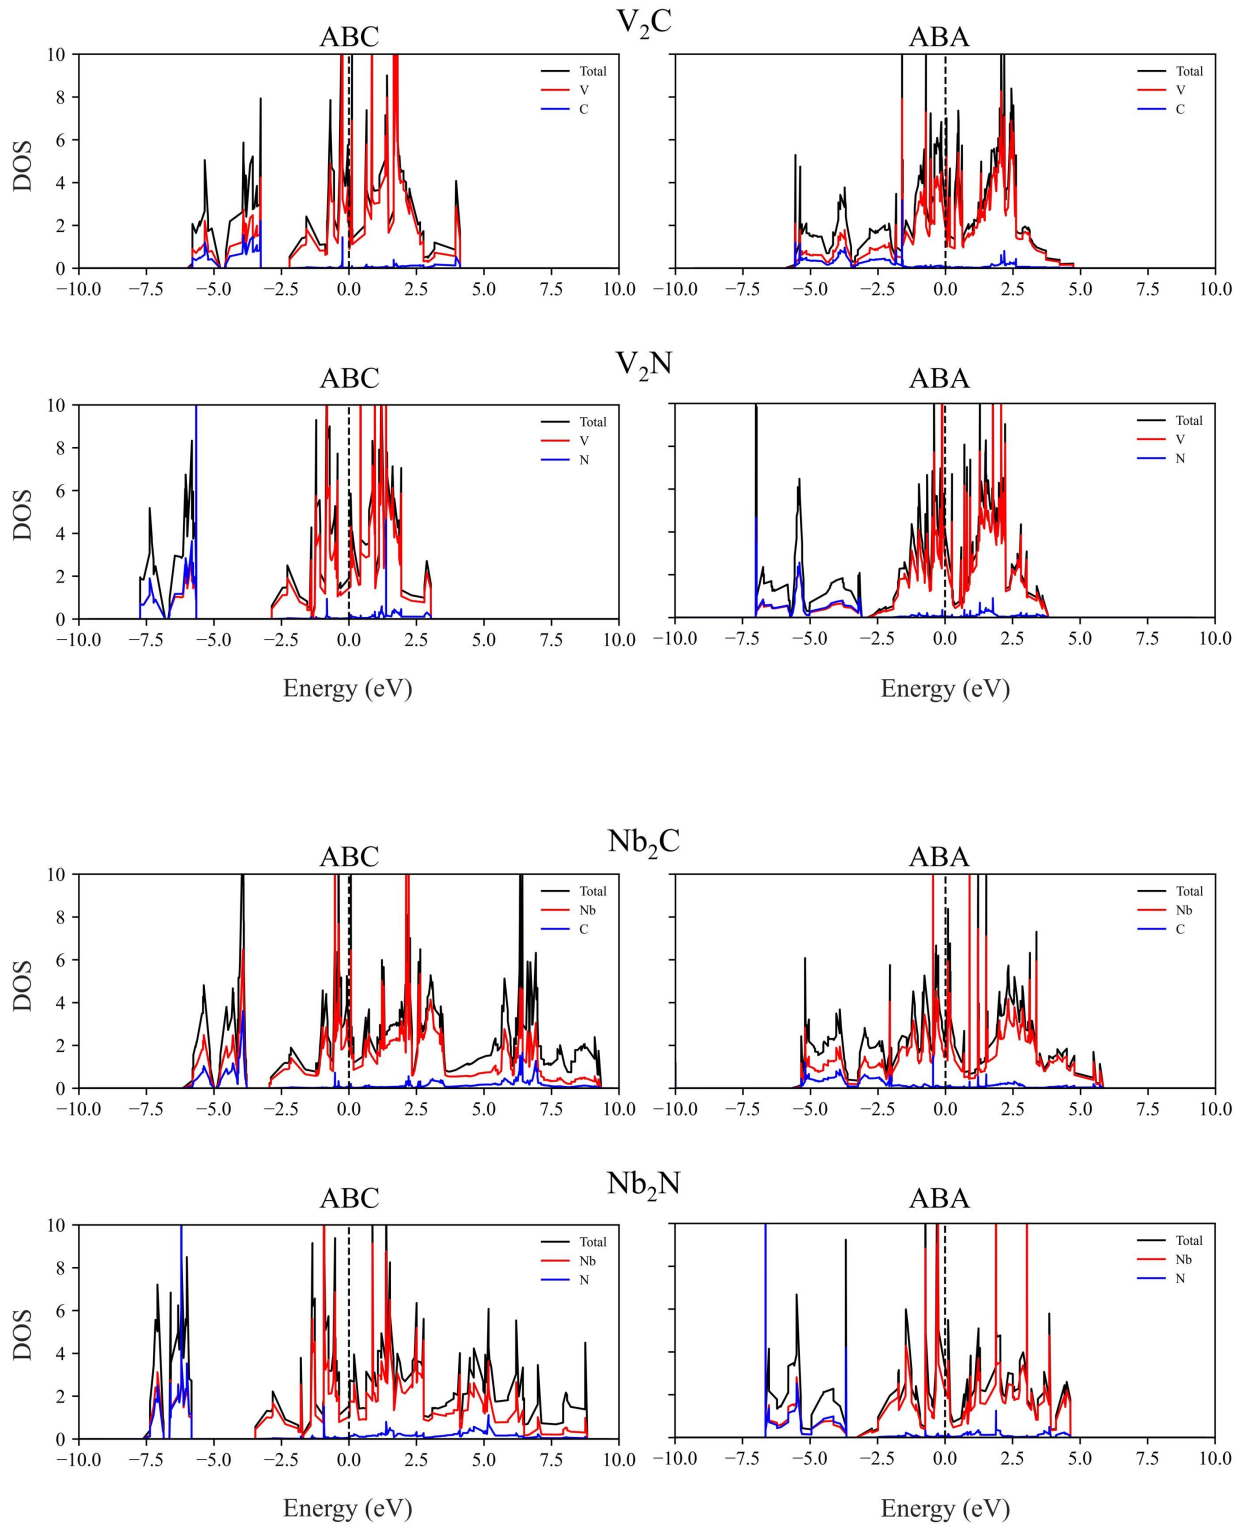

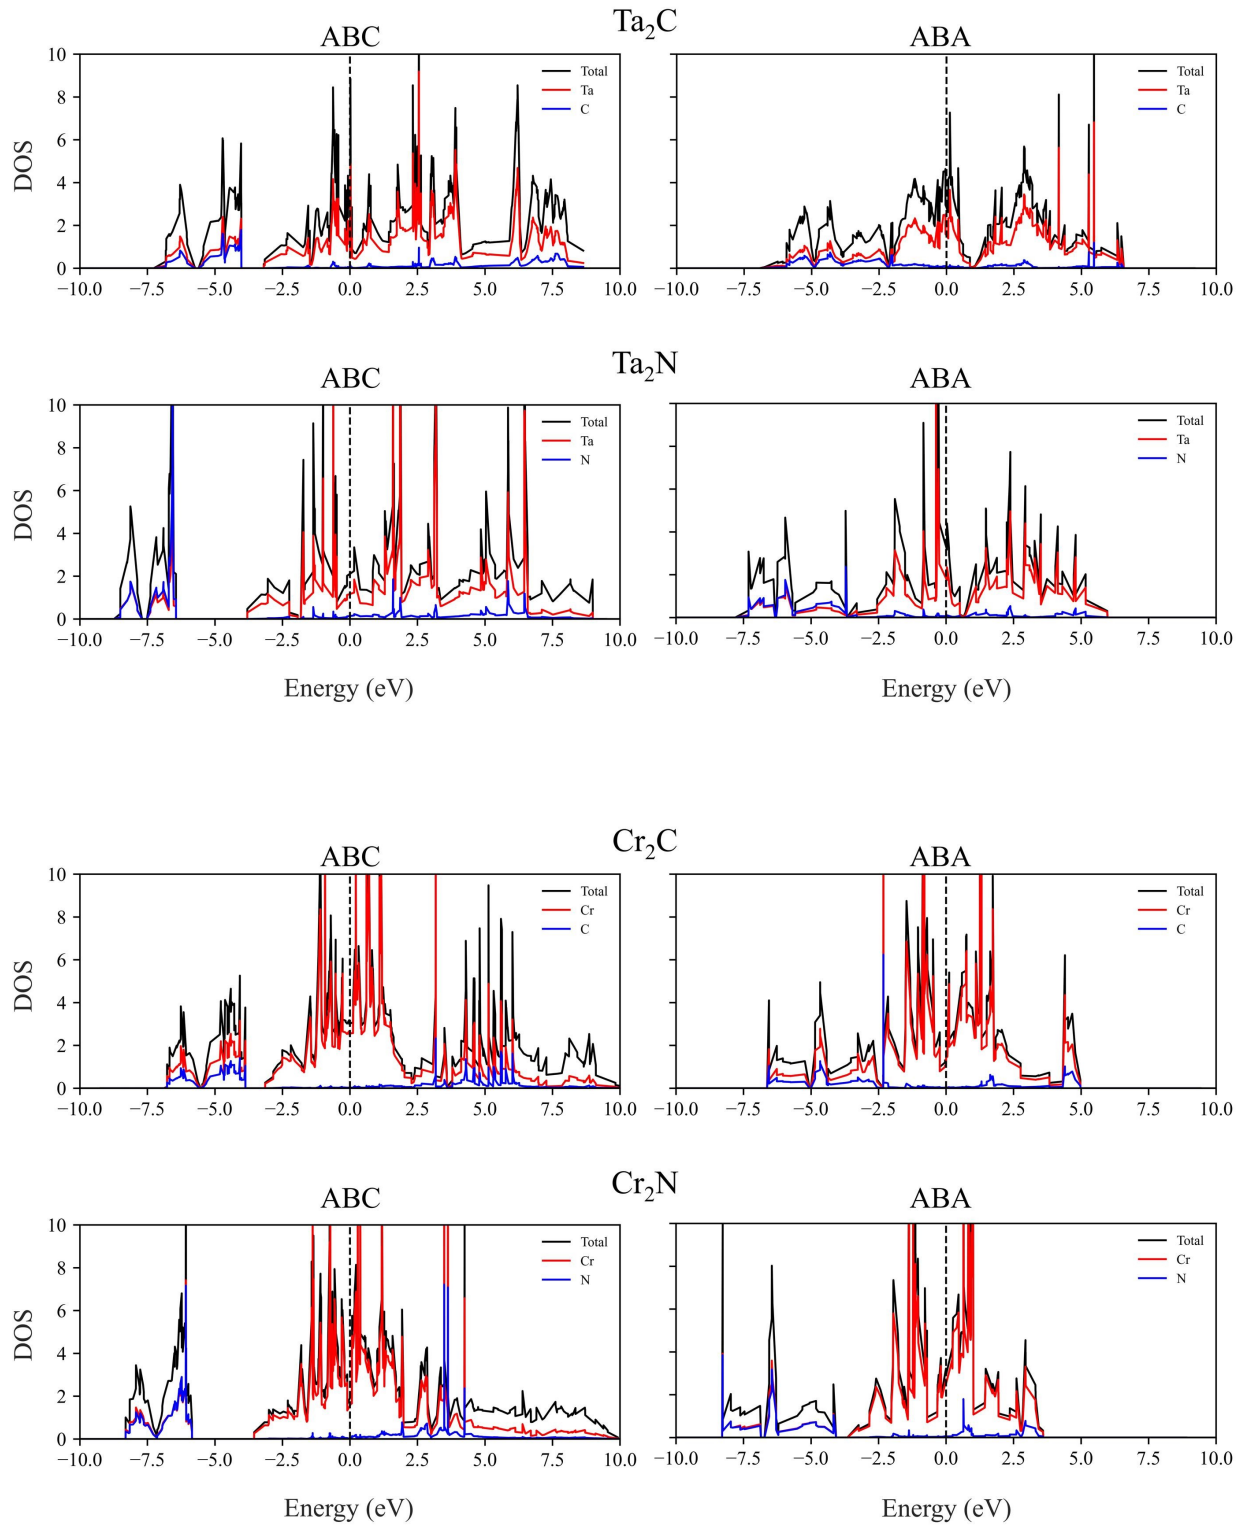



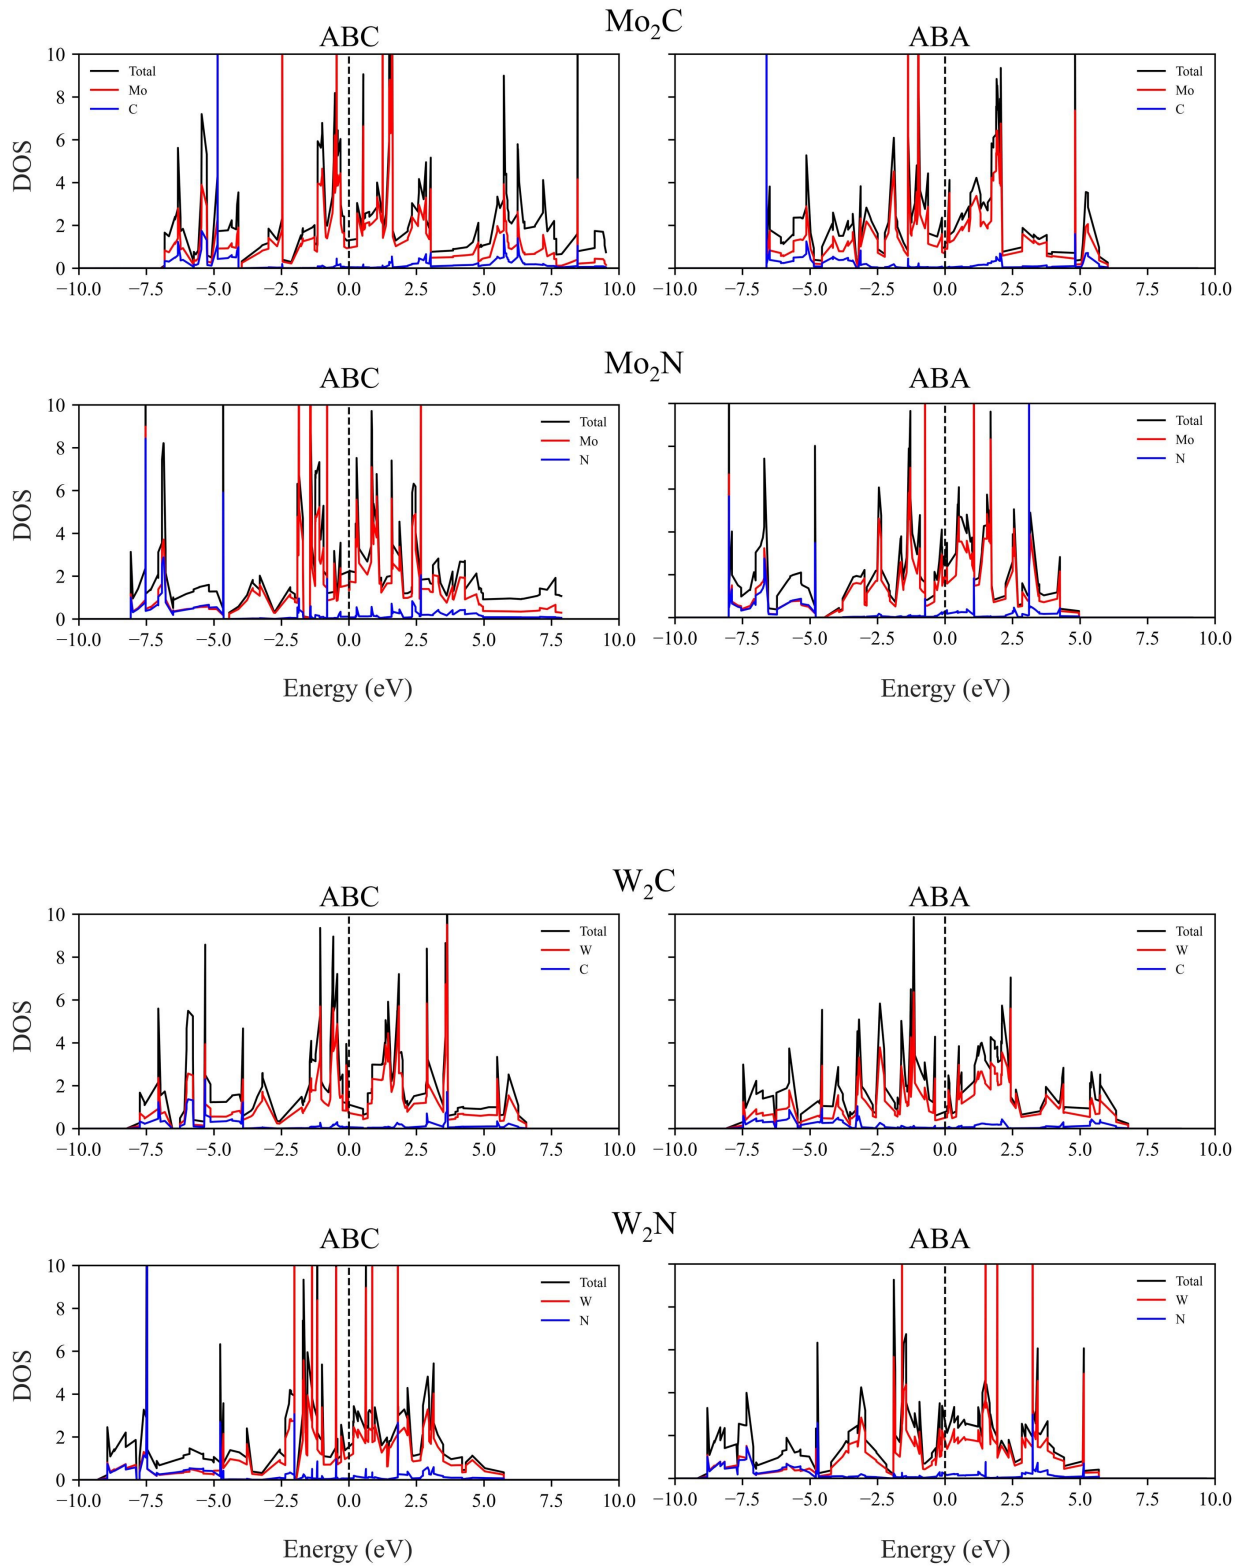

**Table S4** Calculated lattice parameters,  $a$ , and MXene widths,  $d$ , for the six studied  $M_2XO_2$  MXenes with ABC or ABA stacking. All values are given in Å.

| $X$ | $M$ | ABC     |         |          |         |         |         | ABA     |         |          |         |         |         |
|-----|-----|---------|---------|----------|---------|---------|---------|---------|---------|----------|---------|---------|---------|
|     |     | $H_M$   |         | $H_{MX}$ |         | $H_X$   |         | $H$     |         | $H_{MX}$ |         | $H_X$   |         |
|     |     | $a$ (Å) | $d$ (Å) | $a$ (Å)  | $d$ (Å) | $a$ (Å) | $d$ (Å) | $a$ (Å) | $d$ (Å) | $a$ (Å)  | $d$ (Å) | $a$ (Å) | $d$ (Å) |
| C   | Sc  | 3.208   | 4.918   | 3.405    | 3.892   | 3.350   | 4.109   | 3.224   | 4.987   | 3.249    | 4.787   | 3.356   | 4.187   |
|     | Y   | 3.554   | 4.870   | 3.702    | 4.067   | 3.641   | 4.332   | 3.537   | 5.034   | 3.535    | 5.066   | 3.635   | 4.439   |
|     | Ti  | 3.011   | 4.467   | 2.986    | 4.616   | 2.941   | 4.850   | 3.041   | 4.494   | 3.012    | 4.659   | 2.965   | 4.896   |
|     | Zr  | 3.303   | 4.697   | 3.268    | 4.884   | 3.210   | 5.157   | 3.323   | 4.761   | 3.272    | 4.969   | 3.212   | 5.226   |
|     | Hf  | 3.372   | 4.379   | 3.212    | 4.828   | 3.170   | 5.089   | 3.258   | 4.708   | 3.228    | 4.897   | 3.172   | 5.157   |
|     | V   | 2.875   | 4.456   | 2.840    | 4.591   | 2.802   | 4.742   | 2.852   | 4.692   | 2.818    | 4.802   | 2.770   | 4.937   |
|     | Nb  | 3.132   | 4.722   | 3.093    | 4.863   | 3.050   | 5.037   | 3.163   | 4.739   | 3.081    | 5.061   | 3.026   | 5.239   |
|     | Ta  | 3.113   | 4.700   | 3.077    | 4.835   | 3.044   | 5.010   | 3.149   | 4.703   | 3.050    | 5.072   | 3.008   | 5.239   |
|     | Cr  | 2.860   | 4.477   | 2.768    | 4.646   | 2.668   | 4.860   | 2.698   | 4.864   | 2.671    | 4.899   | 2.650   | 4.933   |
|     | Mo  | 3.082   | 4.539   | 2.917    | 5.149   | 2.876   | 5.217   | 2.899   | 5.260   | 2.886    | 5.260   | 2.870   | 5.274   |
|     | W   | 3.100   | 4.526   | 2.896    | 5.248   | 2.874   | 5.285   | 2.890   | 5.319   | 2.890    | 5.301   | 2.879   | 5.297   |
| N   | Sc  | 3.218   | 4.464   | 3.230    | 4.455   | 3.190   | 4.658   | 3.197   | 4.669   | 3.242    | 4.538   | 3.208   | 4.713   |
|     | Y   | 3.510   | 4.758   | 3.520    | 4.697   | 3.476   | 4.913   | 3.489   | 4.971   | 3.516    | 4.821   | 3.484   | 4.983   |
|     | Ti  | 2.978   | 4.454   | 2.938    | 4.635   | 2.894   | 4.826   | 2.998   | 4.482   | 2.936    | 4.723   | 2.891   | 4.913   |
|     | Zr  | 3.248   | 4.740   | 3.221    | 4.880   | 3.187   | 5.083   | 3.271   | 4.771   | 3.231    | 4.974   | 3.161   | 5.217   |
|     | Hf  | 3.194   | 4.666   | 3.163    | 4.824   | 3.131   | 5.027   | 3.213   | 4.710   | 3.176    | 4.920   | 3.119   | 5.159   |
|     | V   | 2.871   | 4.406   | 2.801    | 4.678   | 2.741   | 4.843   | 2.832   | 4.643   | 2.773    | 4.808   | 2.729   | 4.909   |
|     | Nb  | 3.132   | 4.618   | 3.025    | 5.045   | 2.989   | 5.150   | 3.011   | 5.188   | 3.003    | 5.219   | 2.978   | 5.250   |
|     | Ta  | 3.120   | 4.568   | 2.997    | 5.060   | 2.971   | 5.137   | 2.974   | 5.232   | 2.978    | 5.228   | 2.958   | 5.251   |
|     | Cr  | 2.926   | 4.305   | 2.752    | 4.759   | 2.670   | 4.866   | 2.690   | 4.782   | 2.659    | 4.868   | 2.642   | 4.887   |
|     | Mo  | 2.837   | 5.412   | 2.828    | 5.437   | 2.861   | 5.242   | 2.876   | 5.258   | 2.848    | 5.332   | 2.882   | 5.207   |
|     | W   | 2.820   | 5.554   | 2.817    | 5.581   | 2.866   | 5.303   | 2.857   | 5.363   | 2.847    | 5.405   | 2.881   | 5.252   |

**Fig. S2** Evolution of the cell parameter,  $a$ , along  $M$  elements in the studied O-terminated C-MXenes (top) and N-MXenes (bottom) for ABC (left) and ABA (right) stackings, considering the different hollow positions.

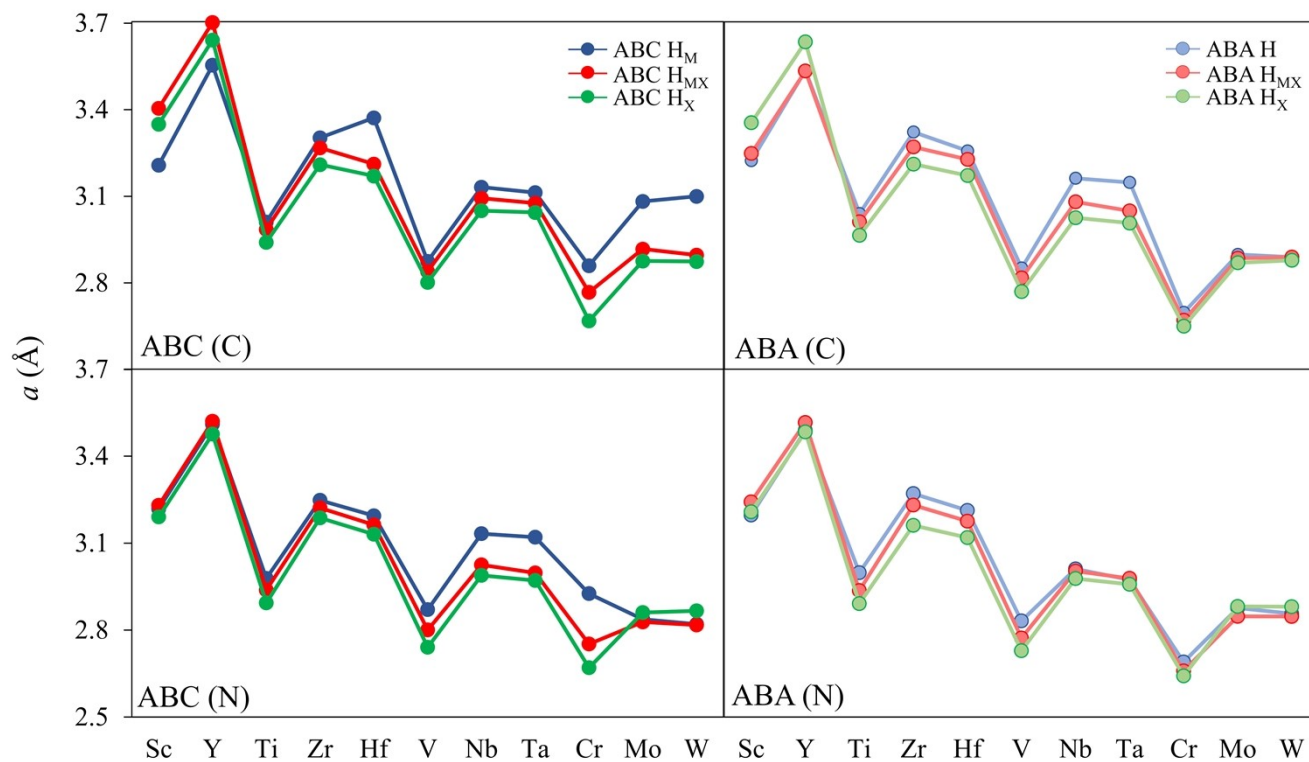

**Fig. S3** Evolution of the MXene width,  $d$ , along  $M$  elements in the studied O-terminated C-MXenes (top) and N-MXenes (bottom) for ABC (left) and ABA (right) stackings, considering the different hollow positions.

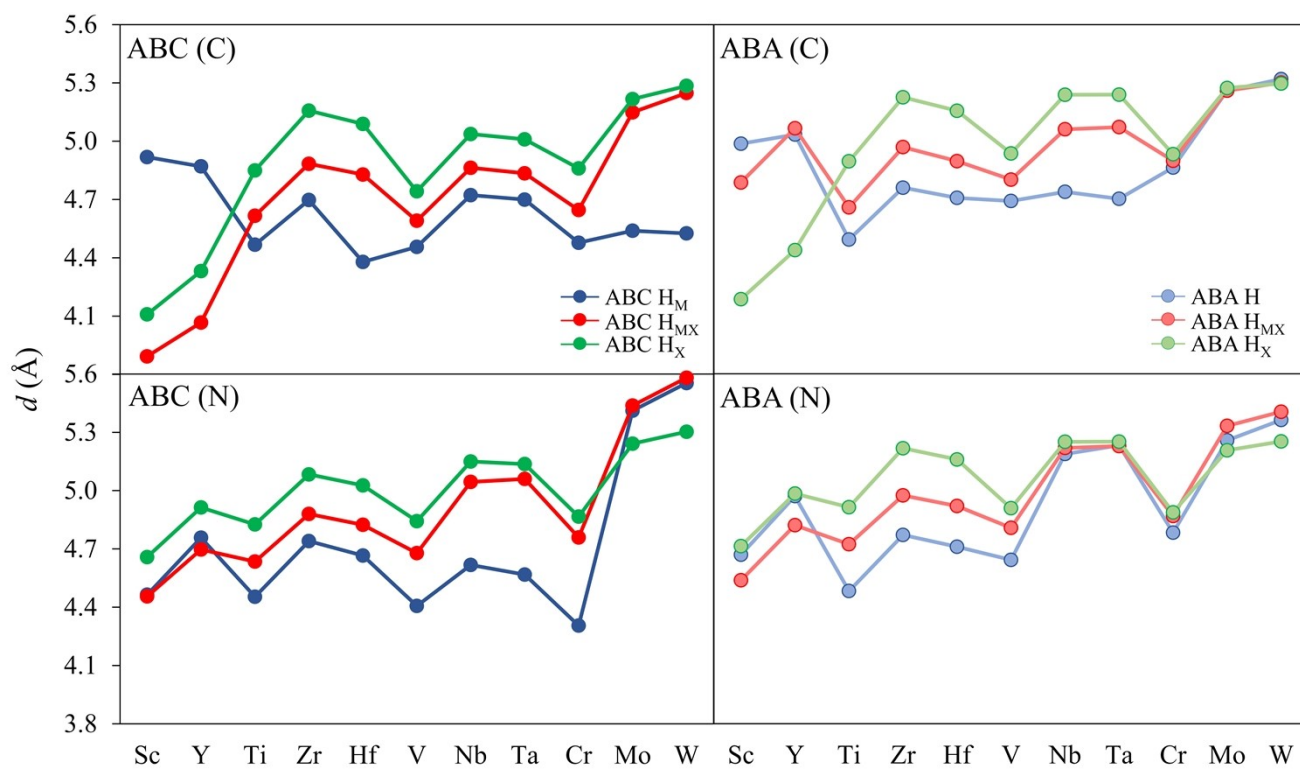

**Table S5** Relative energy,  $\Delta E$ , in eV, for each O-functionalized MXene, with respect the corresponding ABC  $H_M$  case, considering ABC/ABA stacking and different hollow positions. Values in bold indicate the most energetically stable structure.

| <i>M</i>  | C           |              |       |       |          |              | N           |          |              |       |          |              |
|-----------|-------------|--------------|-------|-------|----------|--------------|-------------|----------|--------------|-------|----------|--------------|
|           | ABC         |              |       | H     | ABA      |              | ABC         |          |              | H     | ABA      |              |
|           | $H_M$       | $H_{MX}$     | $H_X$ |       | $H_{MX}$ | $H_X$        | $H_M$       | $H_{MX}$ | $H_X$        |       | $H_{MX}$ | $H_X$        |
| <b>Sc</b> | 0.00        | <b>-0.60</b> | -0.46 | 0.01  | -0.33    | 0.13         | <b>0.00</b> | 0.30     | 0.77         | 0.23  | 0.66     | 1.06         |
| <b>Y</b>  | 0.00        | <b>-0.46</b> | -0.31 | 0.20  | 0.53     | 0.33         | <b>0.00</b> | 0.20     | 0.62         | 0.28  | 0.64     | 0.96         |
| <b>Ti</b> | <b>0.00</b> | 0.79         | 1.81  | 0.35  | 1.16     | 2.07         | <b>0.00</b> | 0.55     | 1.23         | 0.33  | 0.86     | 1.51         |
| <b>Zr</b> | <b>0.00</b> | 0.87         | 1.96  | 0.65  | 1.51     | 2.47         | <b>0.00</b> | 0.41     | 1.08         | 0.59  | 1.00     | 1.68         |
| <b>Hf</b> | <b>0.00</b> | 0.74         | 1.94  | 0.38  | 1.38     | 2.48         | <b>0.00</b> | 0.45     | 1.15         | 0.62  | 1.06     | 1.84         |
| <b>V</b>  | <b>0.00</b> | 0.27         | 0.63  | 0.35  | 0.53     | 0.82         | 0.00        | 0.03     | 0.05         | -0.04 | -0.01    | <b>-0.08</b> |
| <b>Nb</b> | <b>0.00</b> | 0.16         | 0.52  | 0.69  | 0.94     | 1.19         | 0.00        | 0.24     | <b>-0.11</b> | 0.55  | 0.27     | -0.06        |
| <b>Ta</b> | <b>0.00</b> | 0.16         | 0.56  | 0.71  | 1.01     | 1.31         | 0.00        | 0.27     | <b>-0.16</b> | 0.62  | 0.23     | -0.13        |
| <b>Cr</b> | 0.00        | -0.09        | -0.21 | -0.17 | -0.31    | <b>-0.59</b> | 0.00        | 0.36     | 0.29         | 0.33  | 0.19     | <b>-0.02</b> |
| <b>Mo</b> | 0.00        | -0.38        | -1.06 | -0.50 | -0.93    | <b>-1.46</b> | 0.00        | -1.34    | -1.11        | -0.86 | -1.18    | <b>-1.41</b> |
| <b>W</b>  | 0.00        | -0.29        | -1.16 | -0.55 | -1.02    | <b>-1.79</b> | 0.00        | -0.76    | -1.15        | -0.96 | -1.37    | <b>-1.64</b> |

**Table S6** Calculated bandgap,  $E_g$ , in eV, as obtained using PBE or PBE0 functionals, for the O-terminated MXenes in the six different structures studied. Bold values indicate direct bandgap.

| <i>X</i> | <i>M</i> | ABC   |      |             |             |             |             | ABA  |      |          |      |             |             |
|----------|----------|-------|------|-------------|-------------|-------------|-------------|------|------|----------|------|-------------|-------------|
|          |          | $H_M$ |      | $H_{MX}$    |             | $H_X$       |             | $H$  |      | $H_{MX}$ |      | $H_X$       |             |
|          |          | PBE   | PBE0 | PBE         | PBE0        | PBE         | PBE0        | PBE  | PBE0 | PBE      | PBE0 | PBE         | PBE0        |
| C        | Sc       | —     | —    | 2.00        | 3.79        | 2.12        | 3.89        | —    | —    | —        | —    | <b>1.80</b> | <b>3.61</b> |
|          | Y        | —     | —    | <b>1.46</b> | <b>3.11</b> | <b>1.63</b> | <b>3.45</b> | —    | —    | —        | —    | <b>1.19</b> | <b>3.02</b> |
|          | Ti       | 0.26  | 1.64 | 0.79        | 2.24        | 0.43        | 1.86        | 0.09 | 1.44 | 0.58     | 2.15 | 0.52        | 2.15        |
|          | Zr       | 0.87  | 2.26 | 1.06        | 2.43        | 0.62        | 2.01        | 0.56 | 1.90 | 0.80     | 2.18 | 0.93        | 2.38        |
|          | Hf       | 1.29  | 2.74 | 1.06        | 2.46        | 0.61        | 2.06        | 0.67 | 2.07 | 0.78     | 2.20 | 0.97        | 2.37        |
|          | V        | —     | —    | —           | —           | —           | 0.77        | —    | 0.46 | —        | —    | —           | 0.67        |
|          | Nb       | —     | —    | —           | 0.63        | —           | 0.12        | —    | 0.56 | —        | 0.97 | —           | —           |
|          | Ta       | —     | —    | —           | 0.63        | —           | —           | —    | 0.75 | —        | 0.92 | —           | —           |
|          | Cr       | —     | 1.27 | —           | —           | <b>0.14</b> | <b>0.71</b> | —    | 0.57 | —        | 1.65 | —           | 0.66        |
|          | Mo       | —     | —    | —           | —           | —           | 0.65        | —    | 0.49 | —        | —    | —           | 0.64        |
|          | W        | —     | —    | —           | —           | —           | 0.66        | —    | 0.66 | —        | —    | —           | 0.63        |
|          | Sc       | —     | 0.91 | 0.68        | 2.93        | 1.03        | 3.66        | —    | —    | 0.33     | 2.58 | 1.10        | 3.49        |
|          | Y        | —     | —    | 0.86        | 3.18        | 1.07        | 3.68        | —    | —    | 0.48     | 2.83 | 1.16        | 3.49        |
|          | N        | Ti    | —    | 0.37        | —           | —           | —           | —    | —    | 1.66     | —    | 0.85        | —           |
| Zr       |          | —     | —    | —           | —           | —           | —           | —    | 1.00 | —        | 0.98 | —           | —           |
| Hf       |          | —     | —    | —           | —           | —           | —           | —    | 0.64 | —        | 0.82 | —           | —           |
| V        |          | —     | —    | —           | 1.17        | —           | 0.16        | —    | —    | —        | —    | —           | —           |
| Nb       |          | —     | —    | —           | 0.41        | —           | —           | —    | 0.40 | —        | 0.59 | —           | —           |
| Ta       |          | —     | —    | —           | —           | —           | —           | —    | —    | —        | —    | —           | —           |
| Cr       |          | —     | —    | —           | —           | —           | —           | —    | 0.64 | —        | 0.04 | —           | —           |
| Mo       |          | —     | —    | —           | —           | —           | —           | —    | —    | —        | —    | —           | —           |
| W        |          | —     | —    | —           | —           | —           | —           | —    | —    | —        | —    | —           | —           |

**Fig. S4** Total and projected DOS, calculated with PBE0, for all  $M_2XO_2$  cases, considering the six structures studied. Energies corrected to VBM or  $E_F$ , indicated with a dashed black line. The  $M_2XO_2$  species, stacking and O position are specified in each plot.

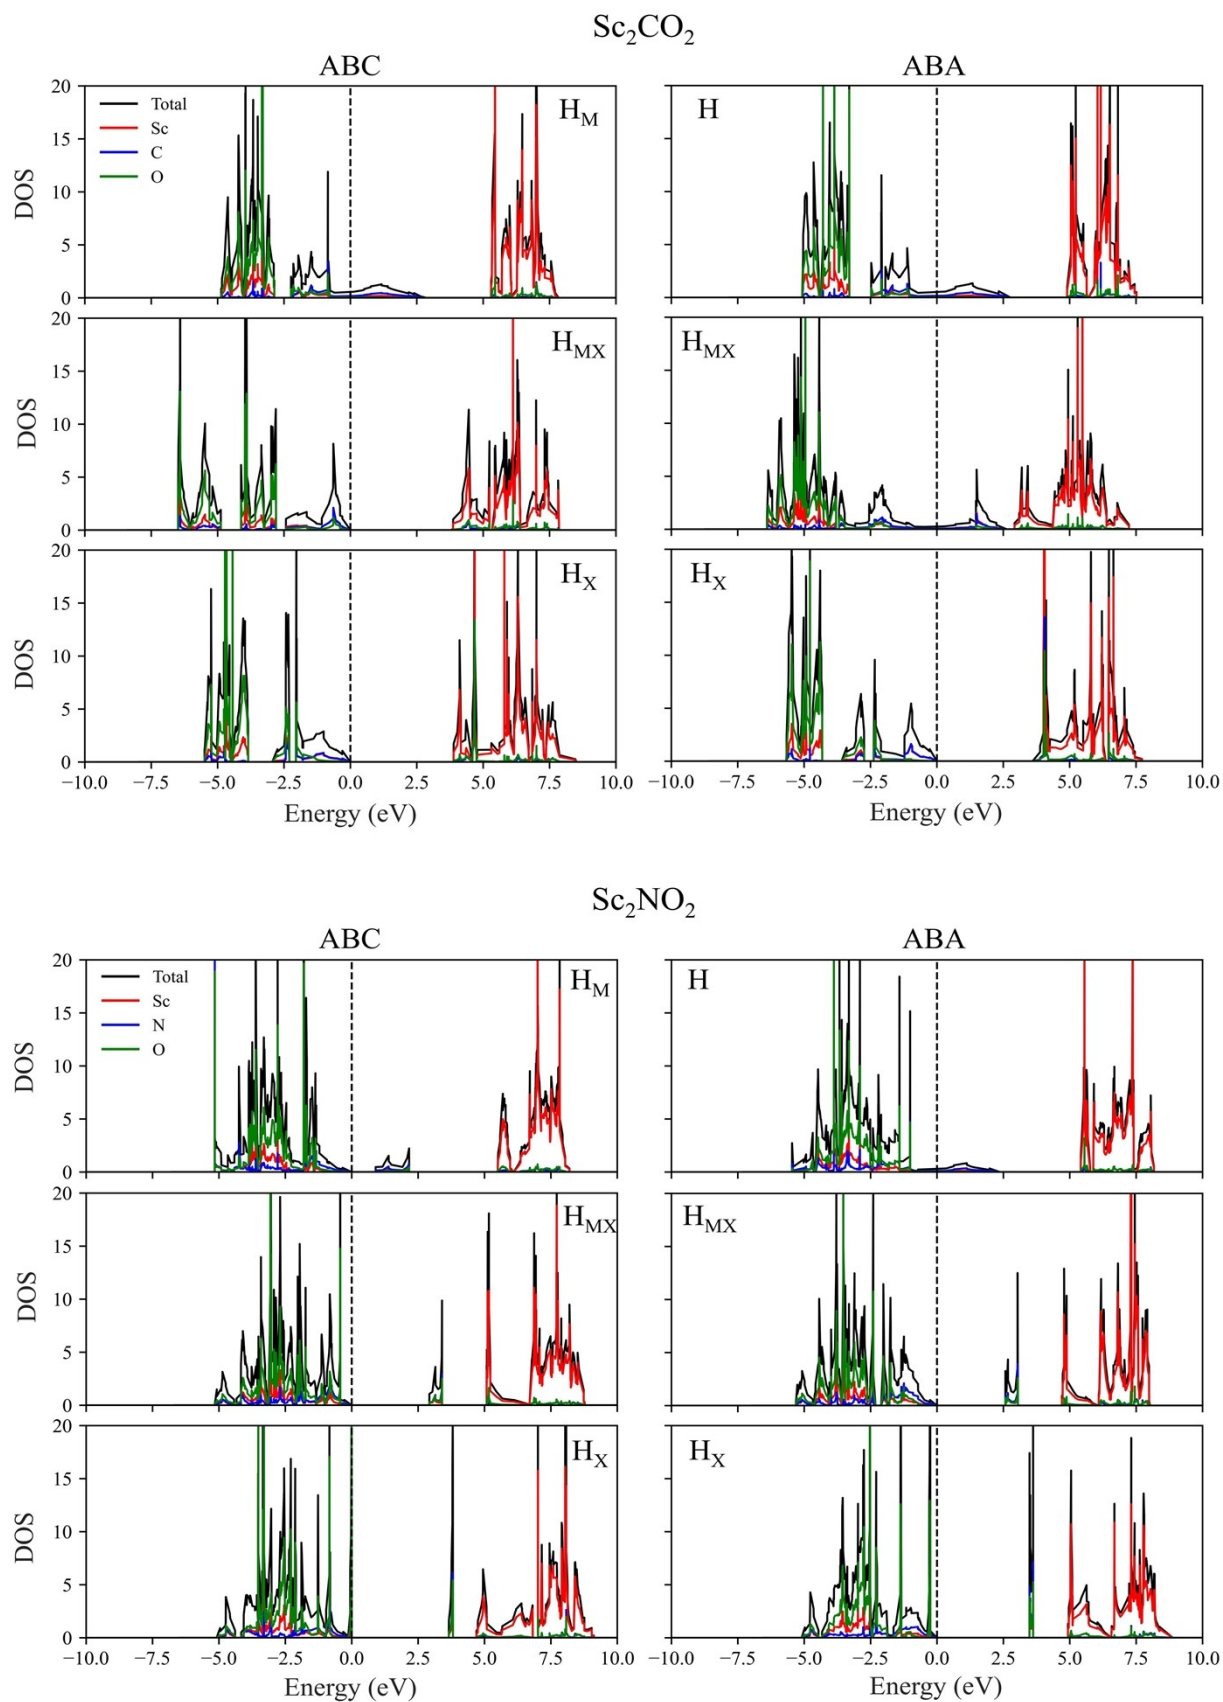

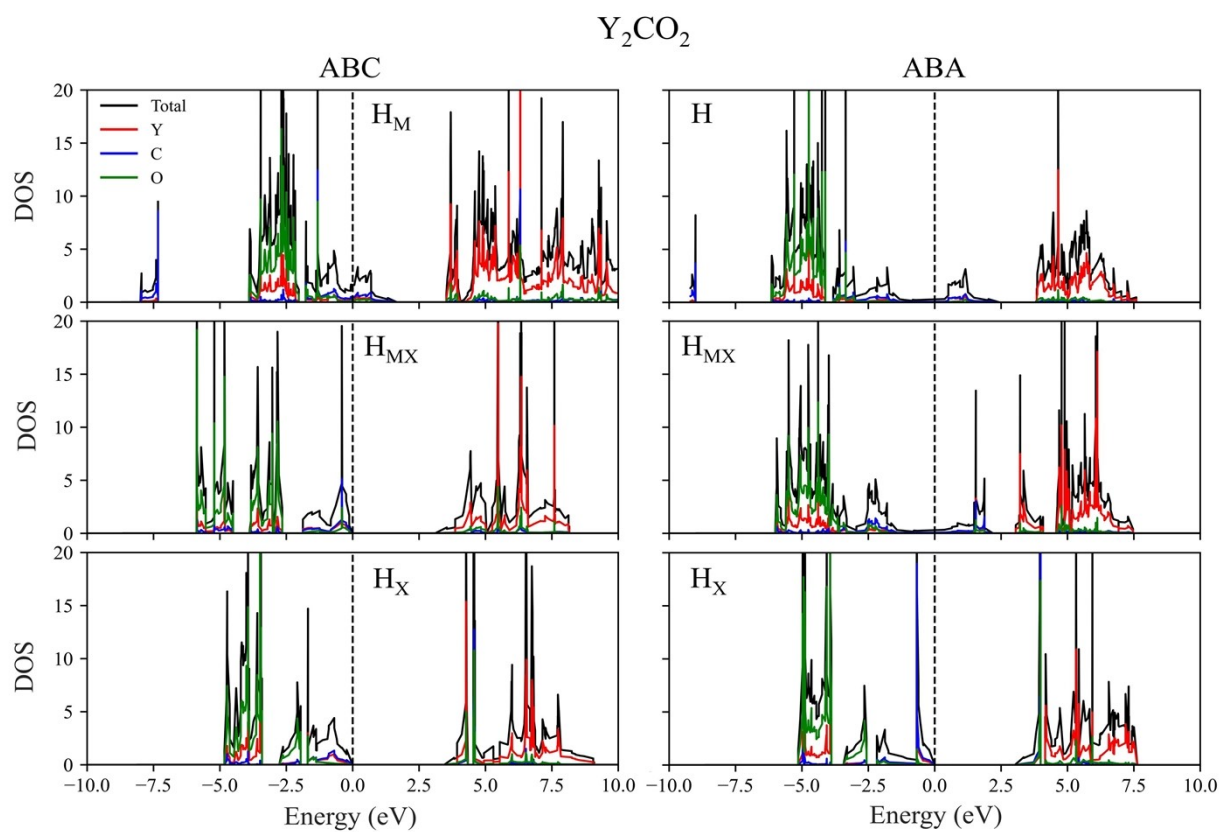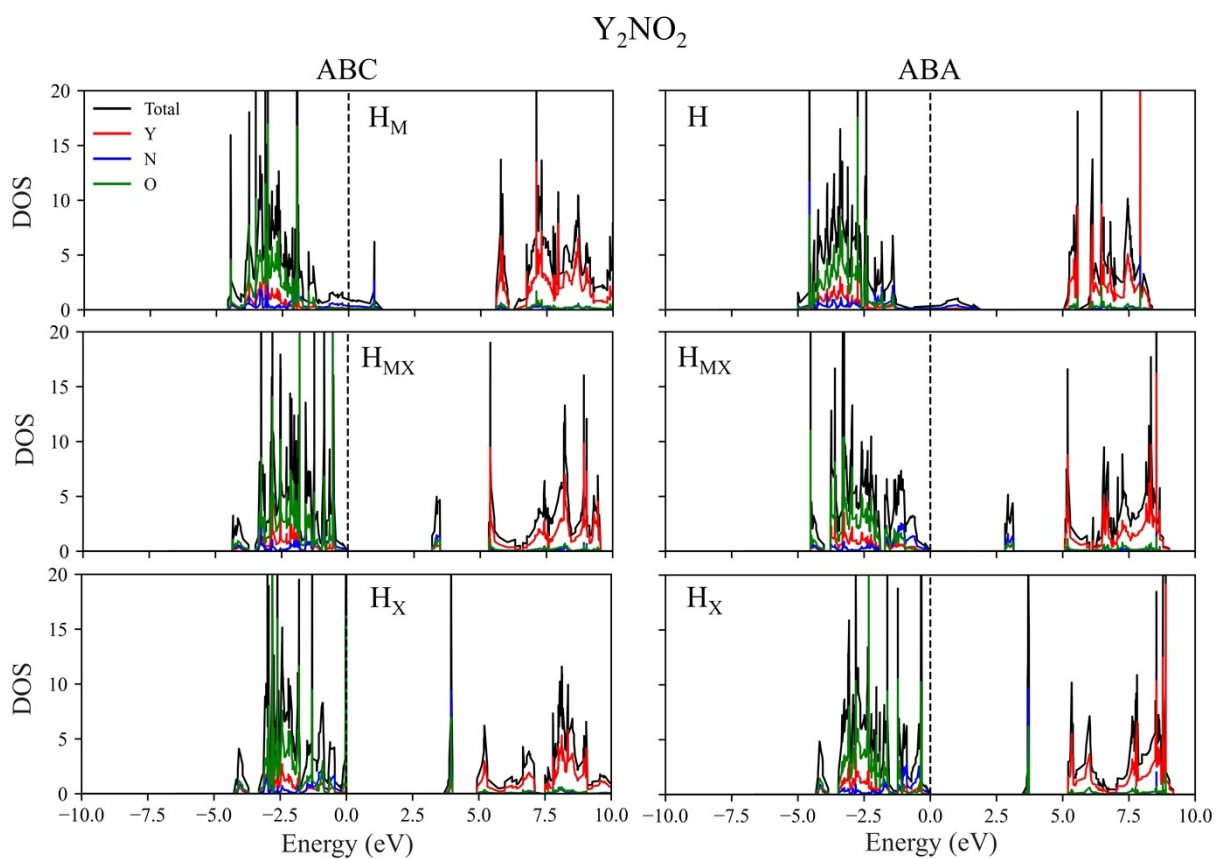



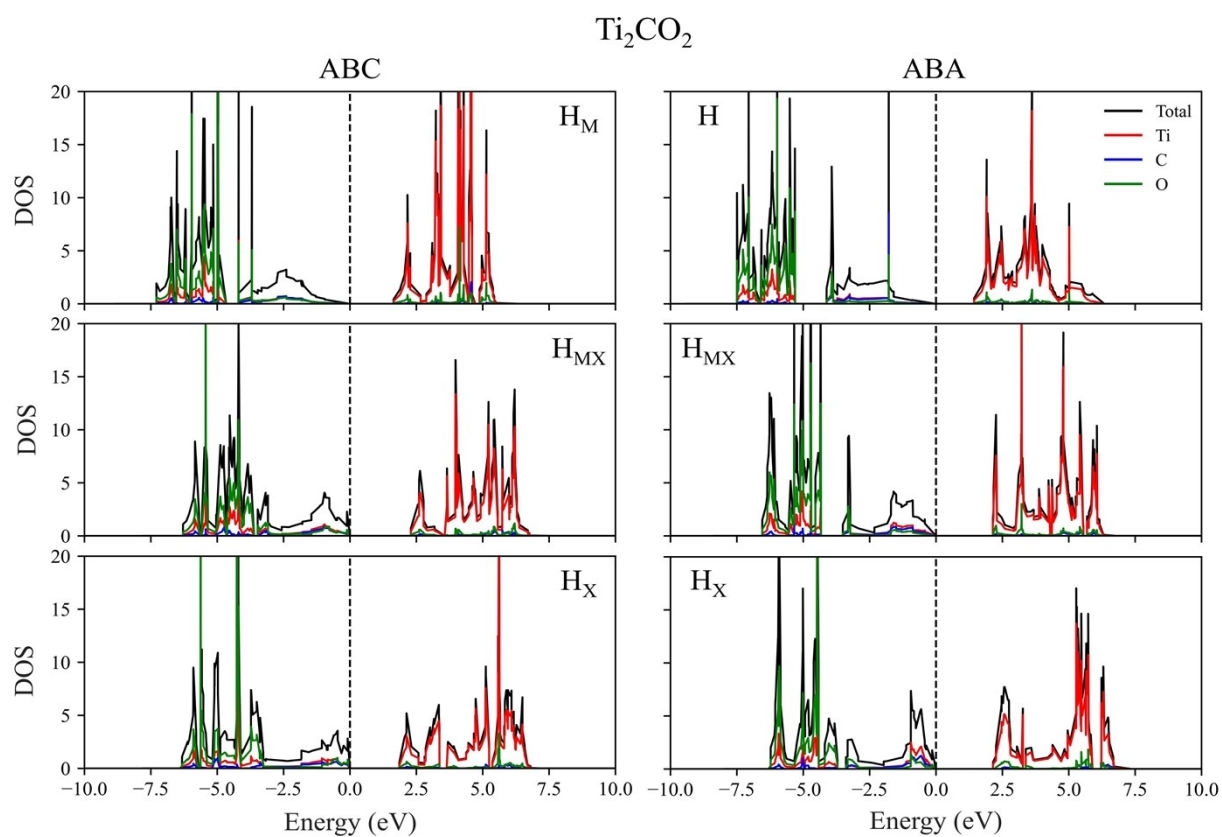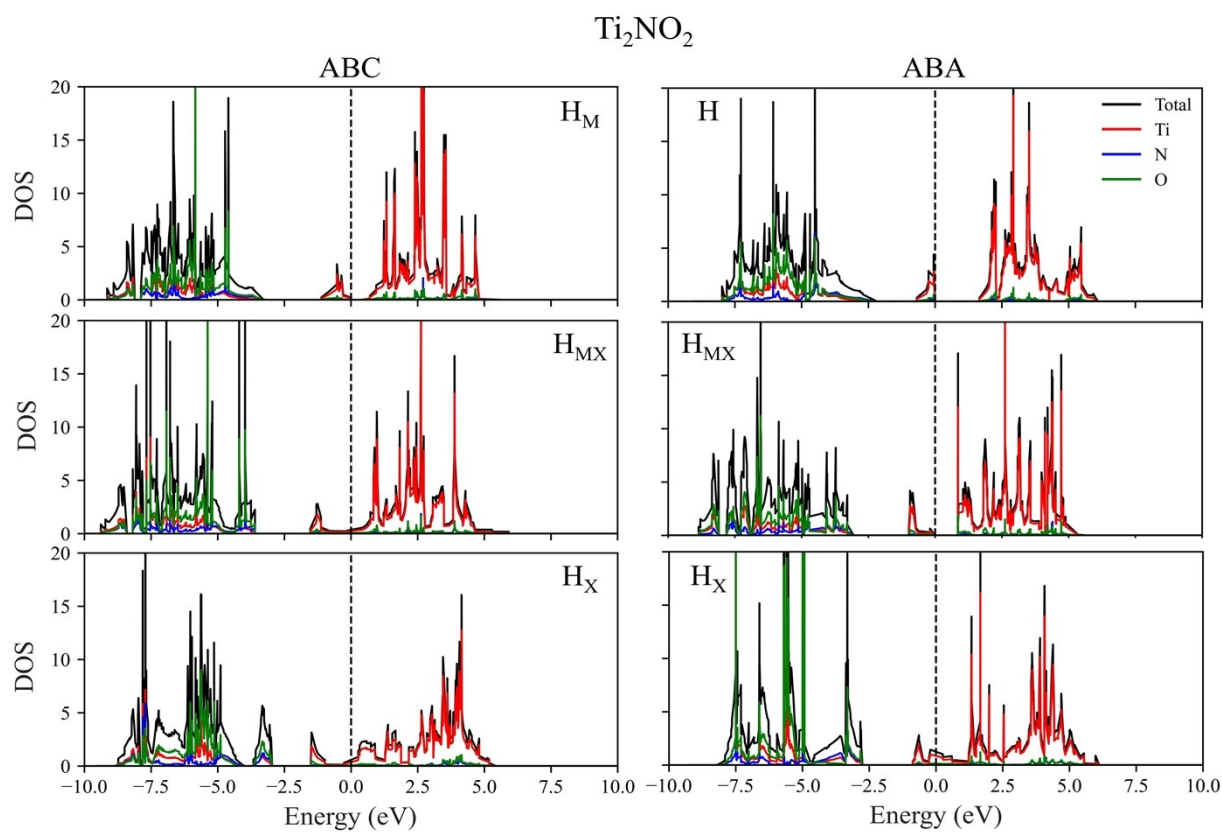

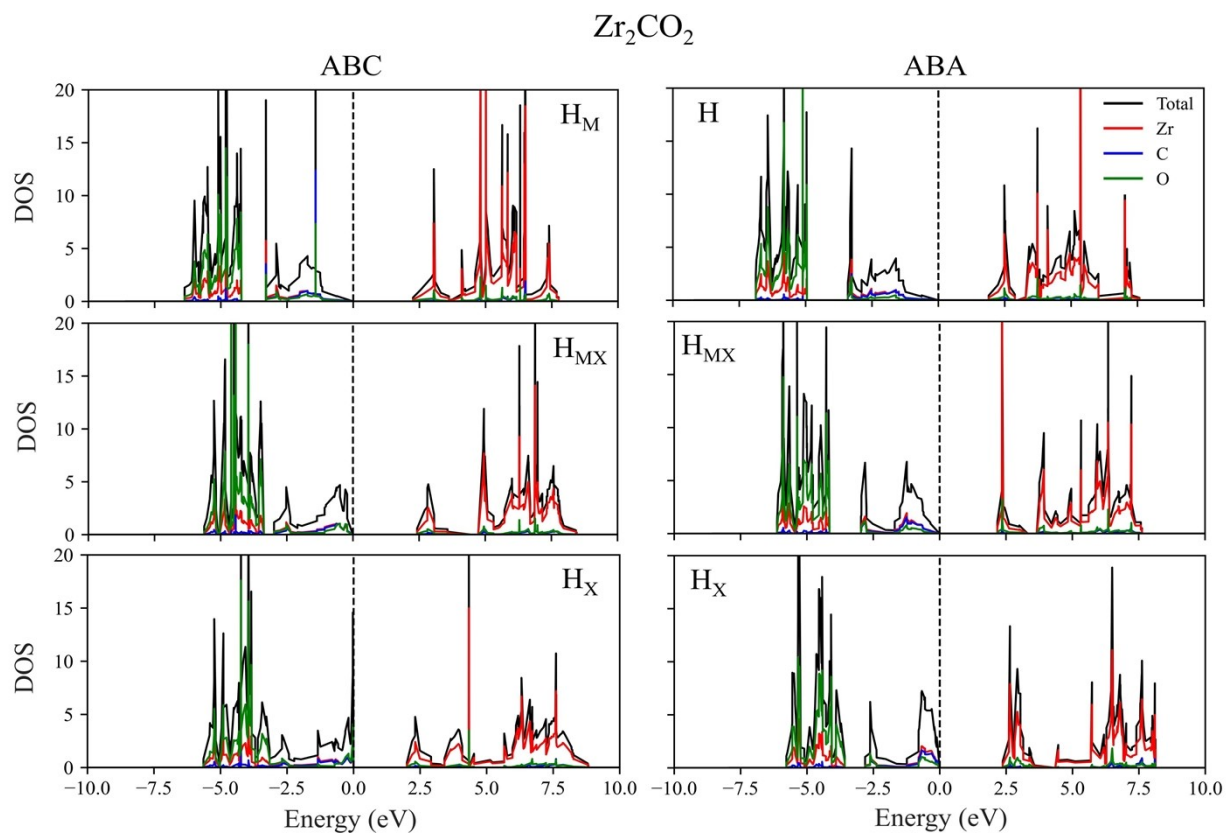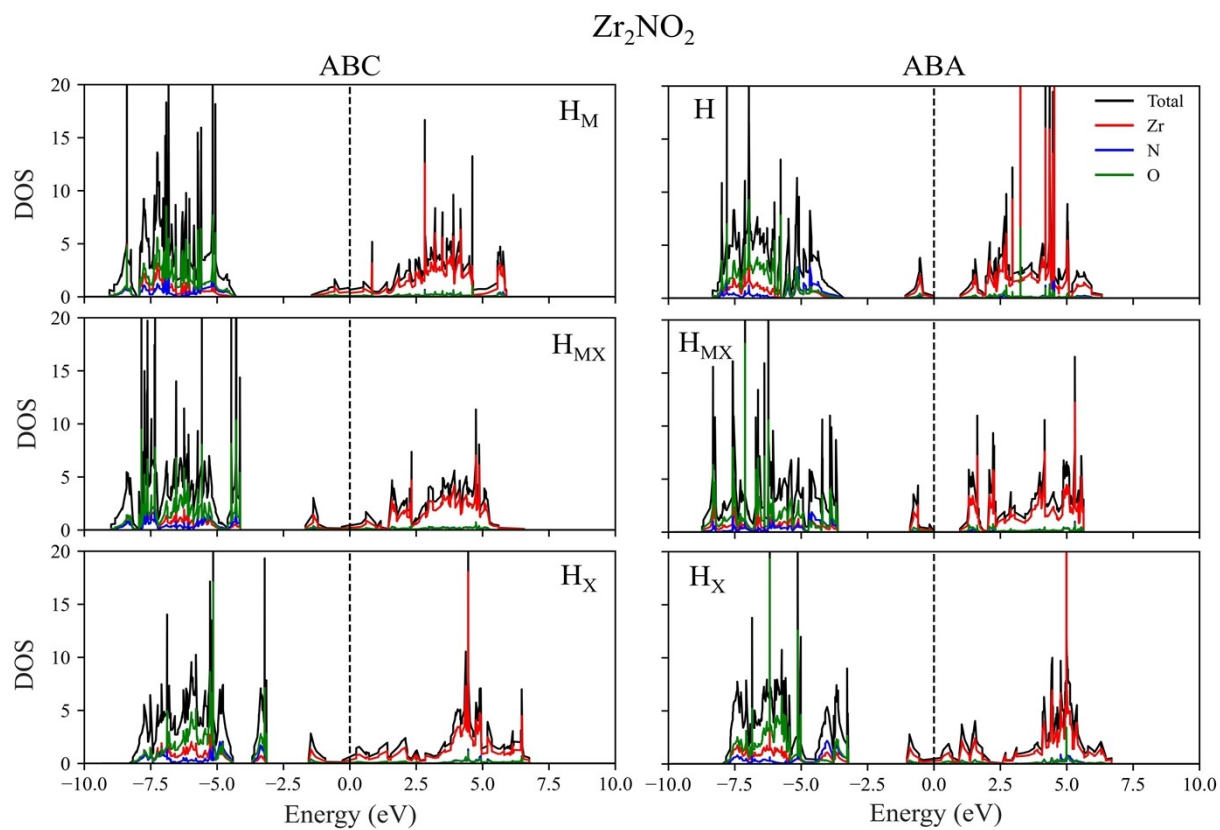

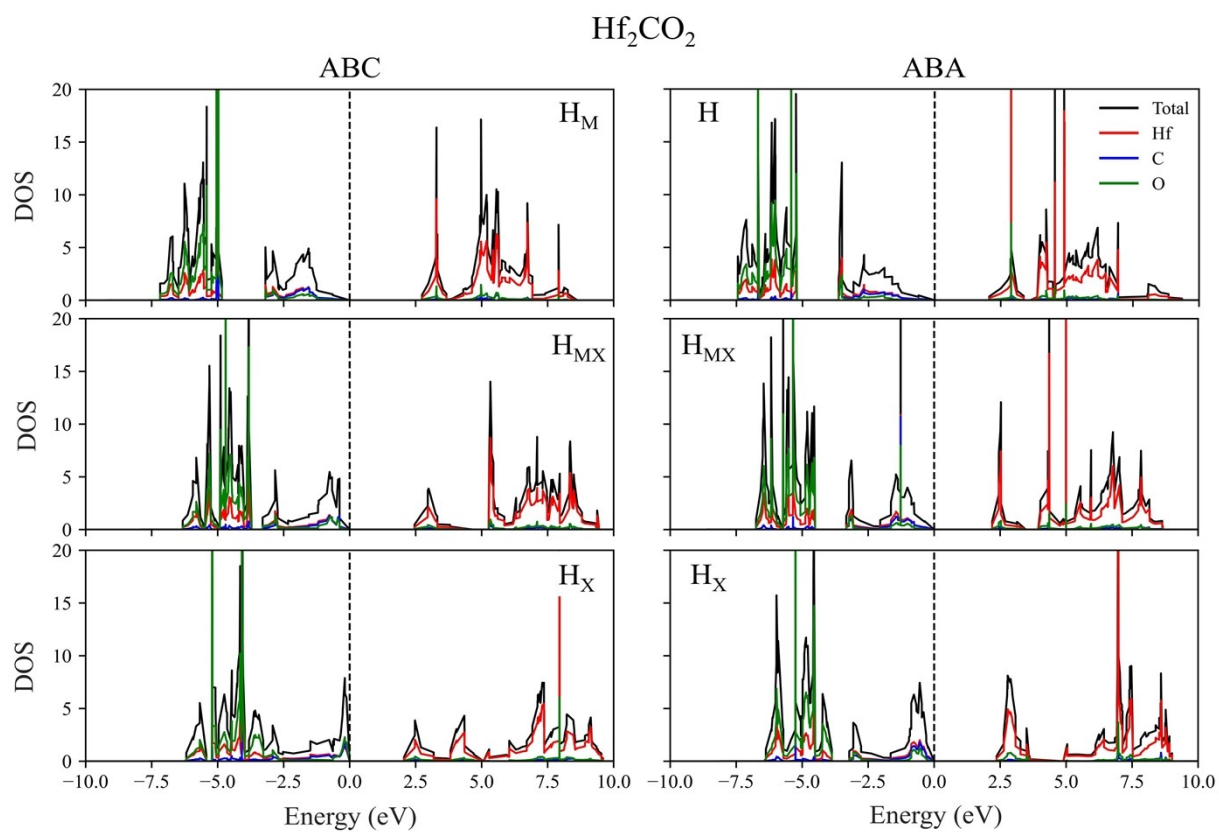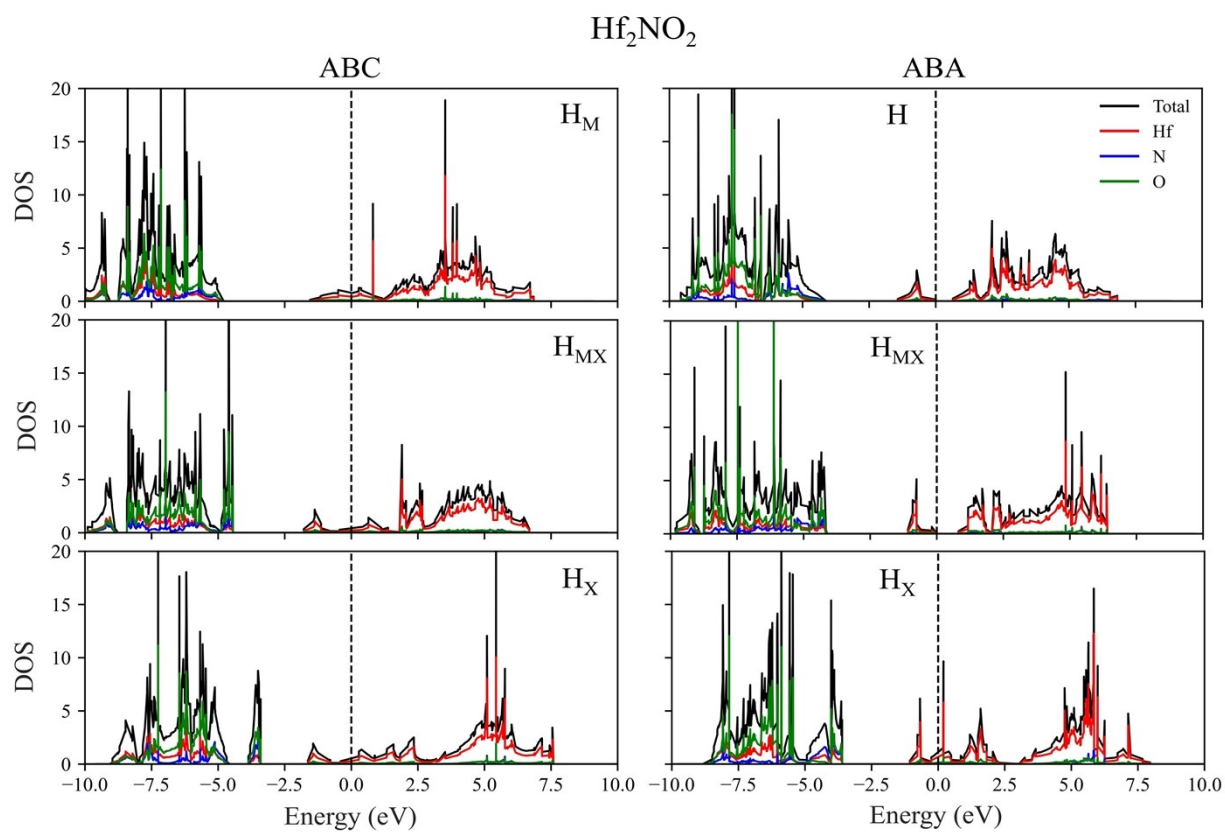

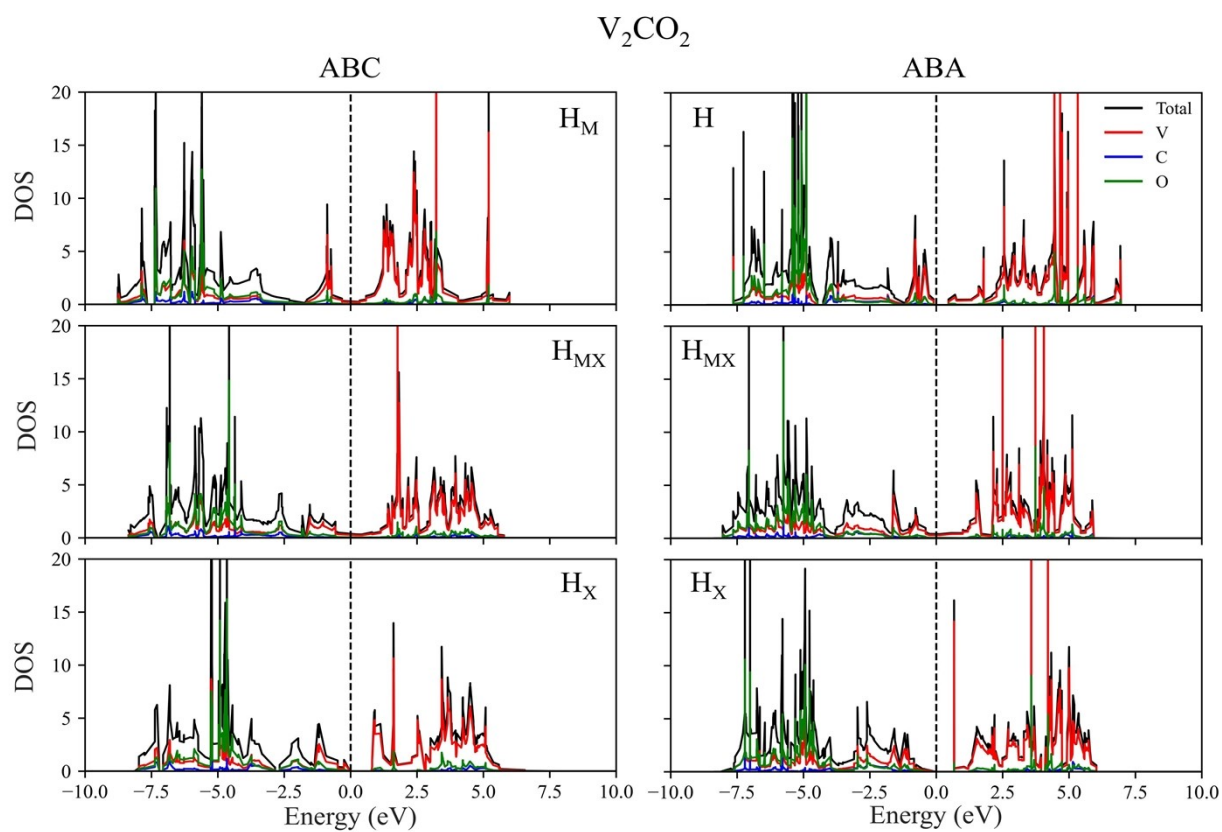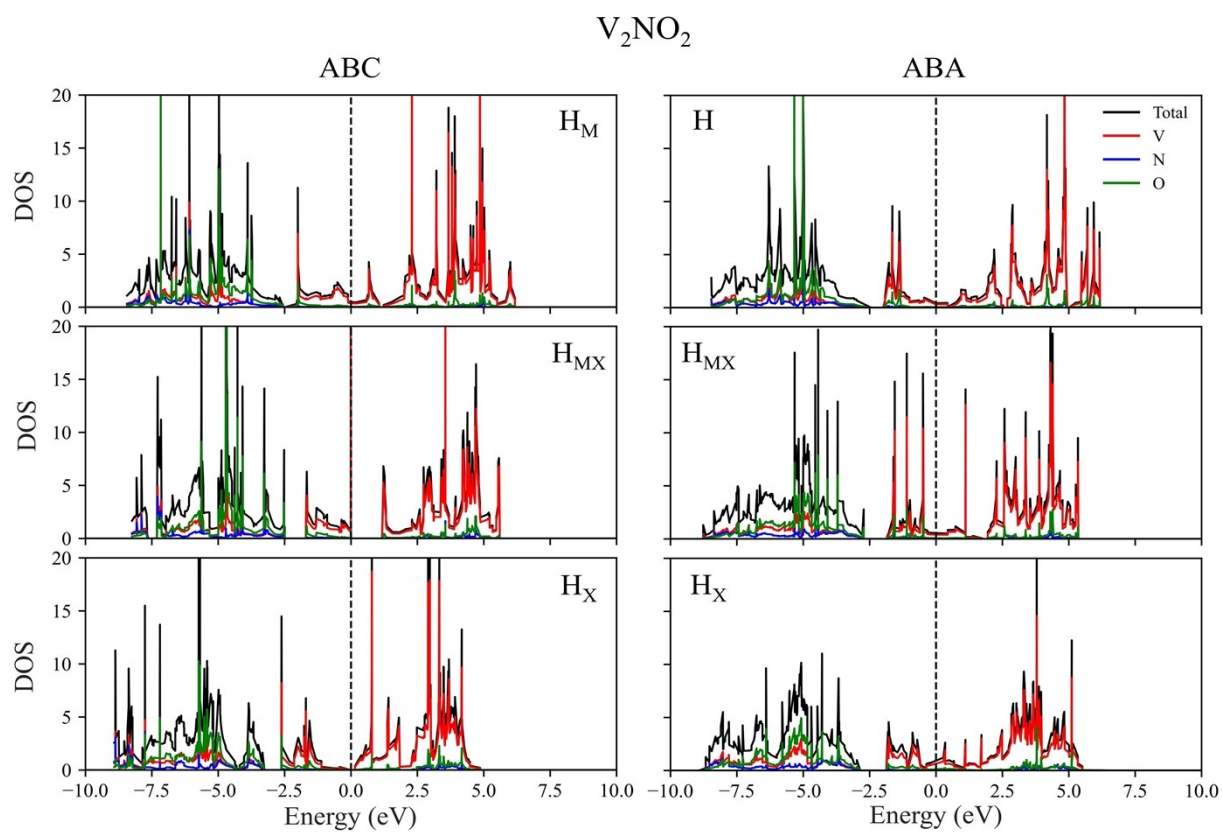

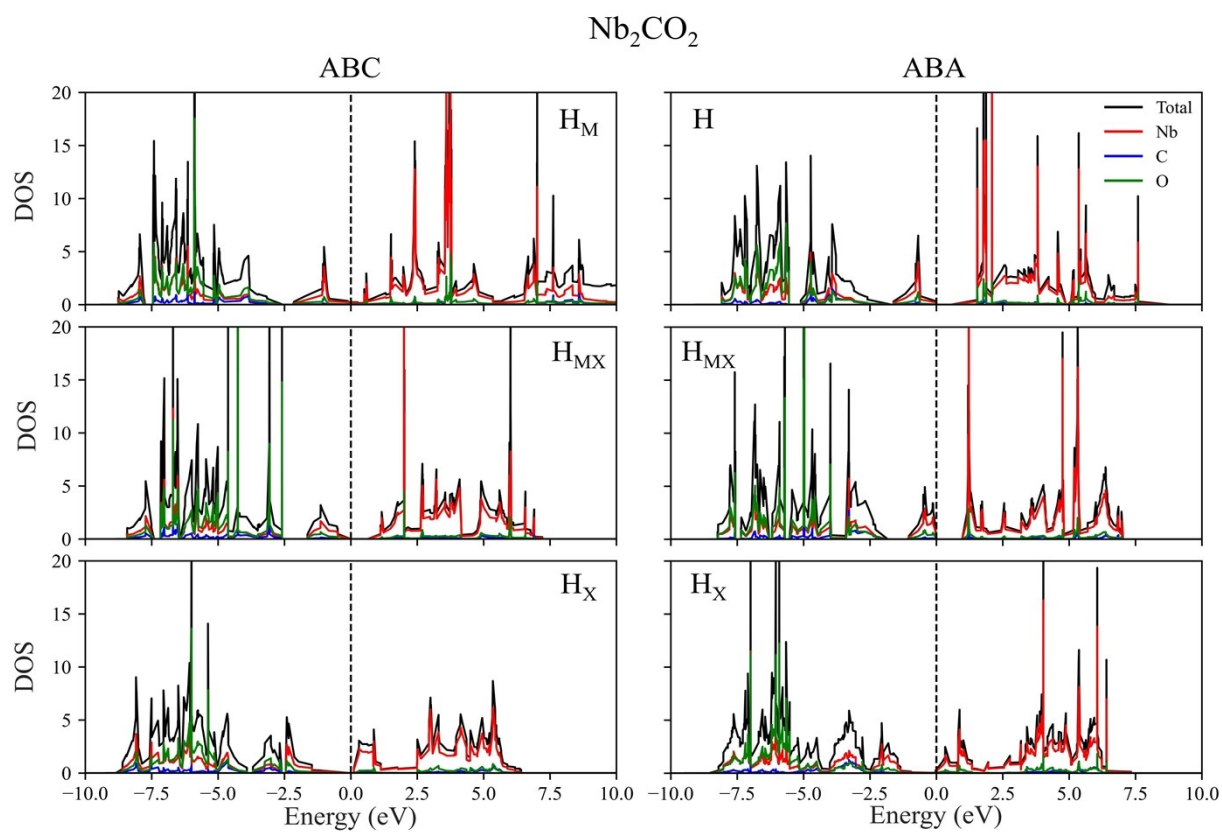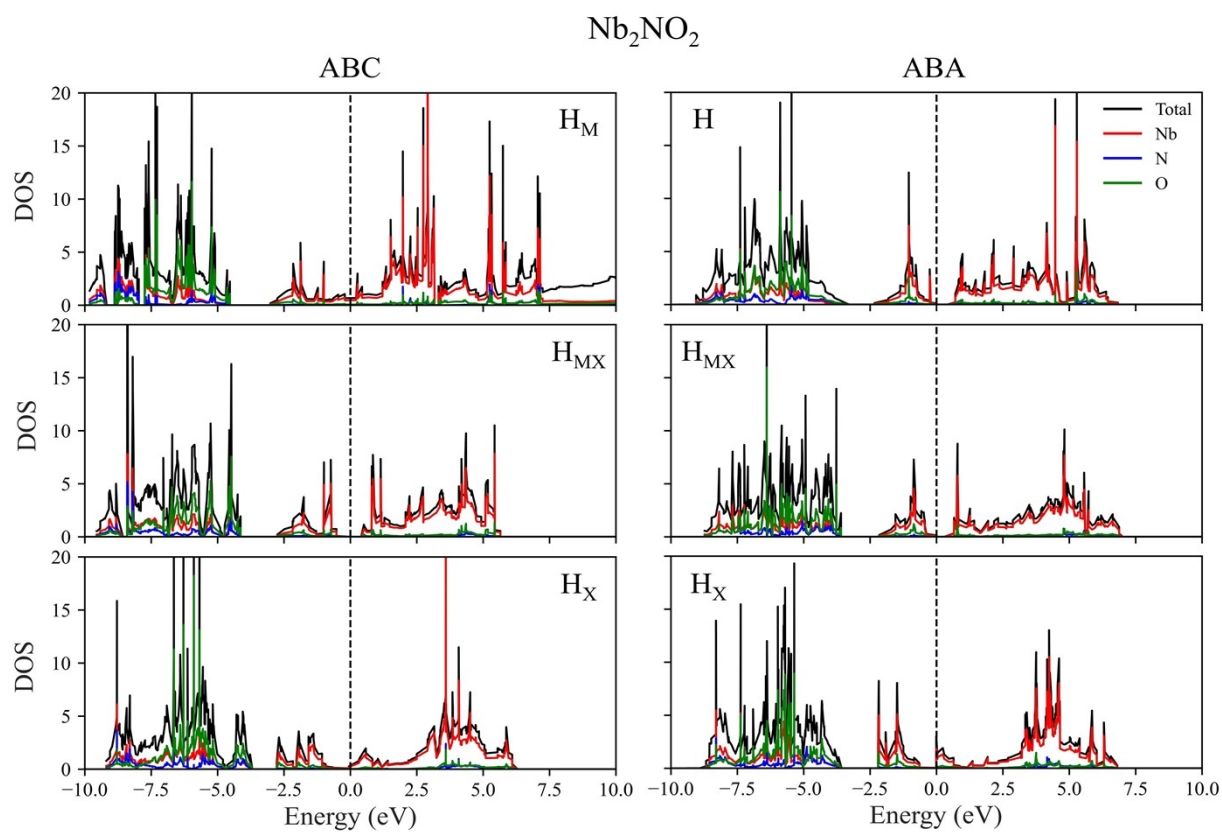



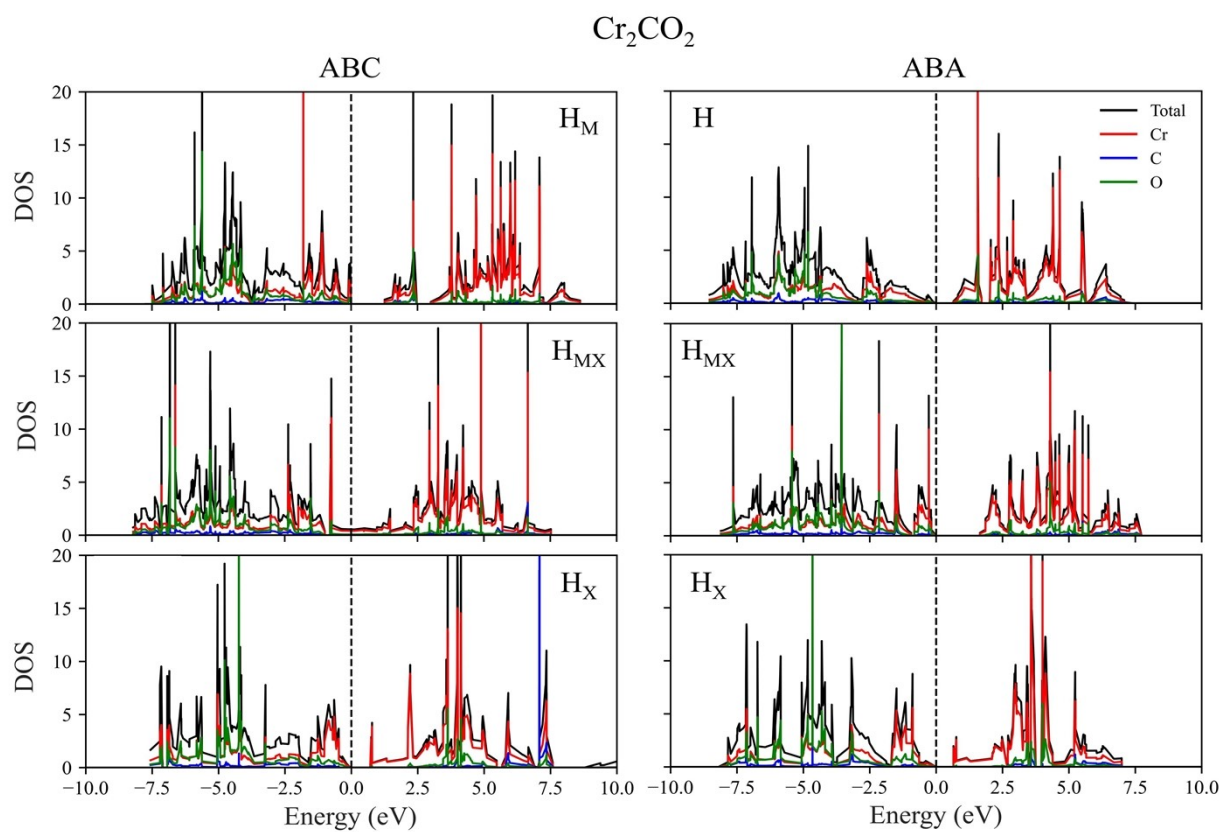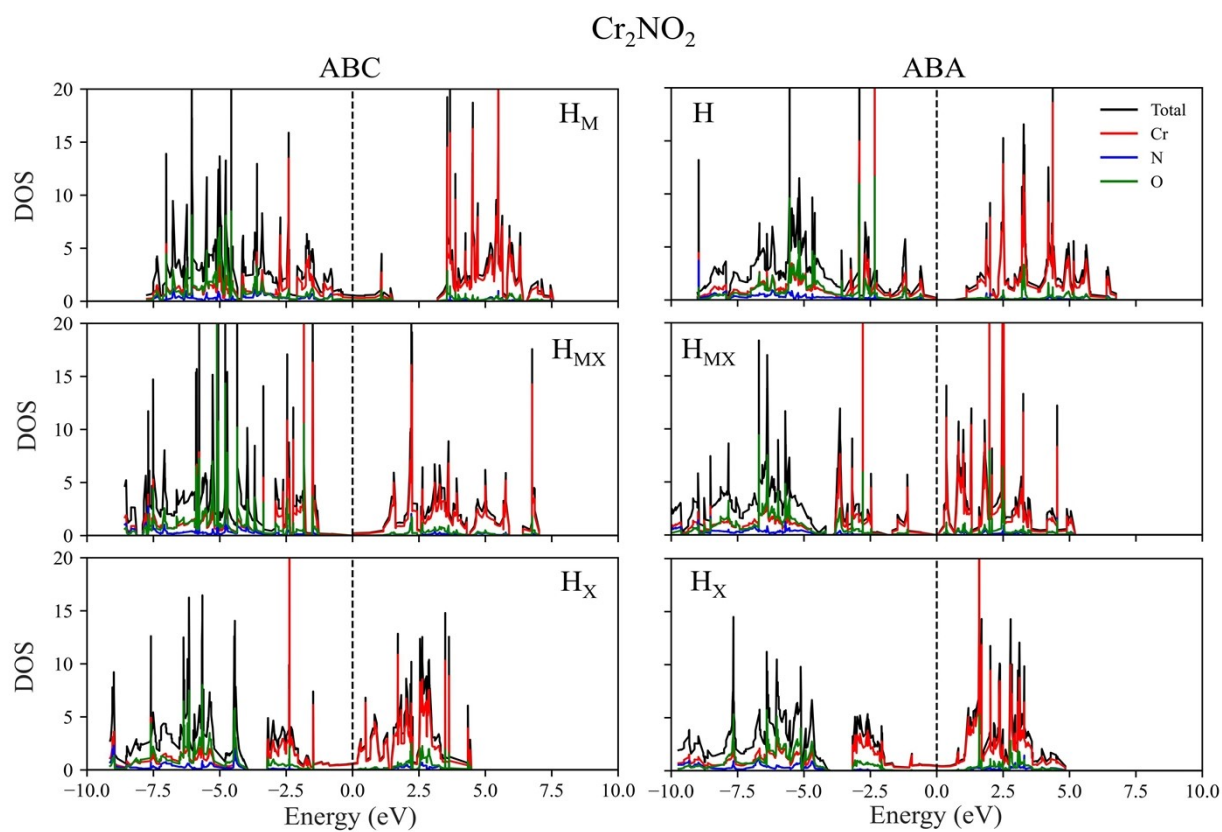

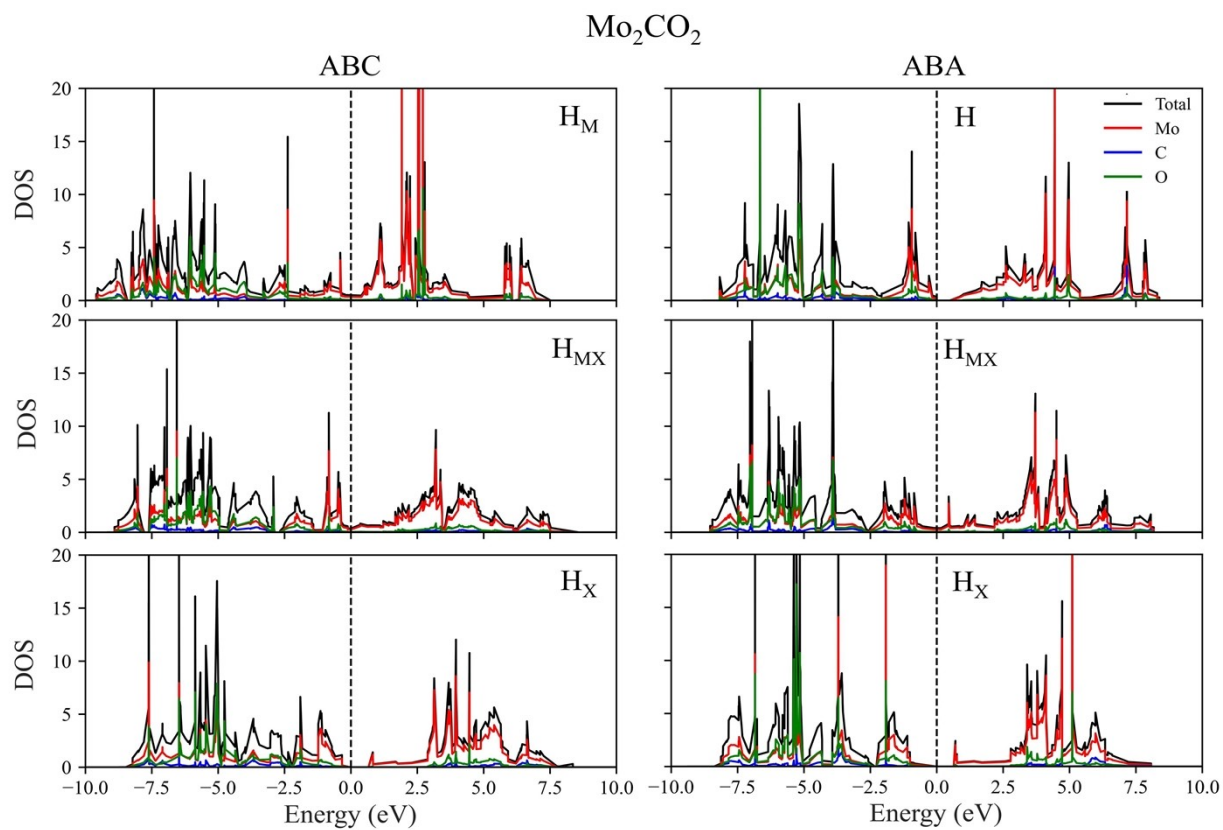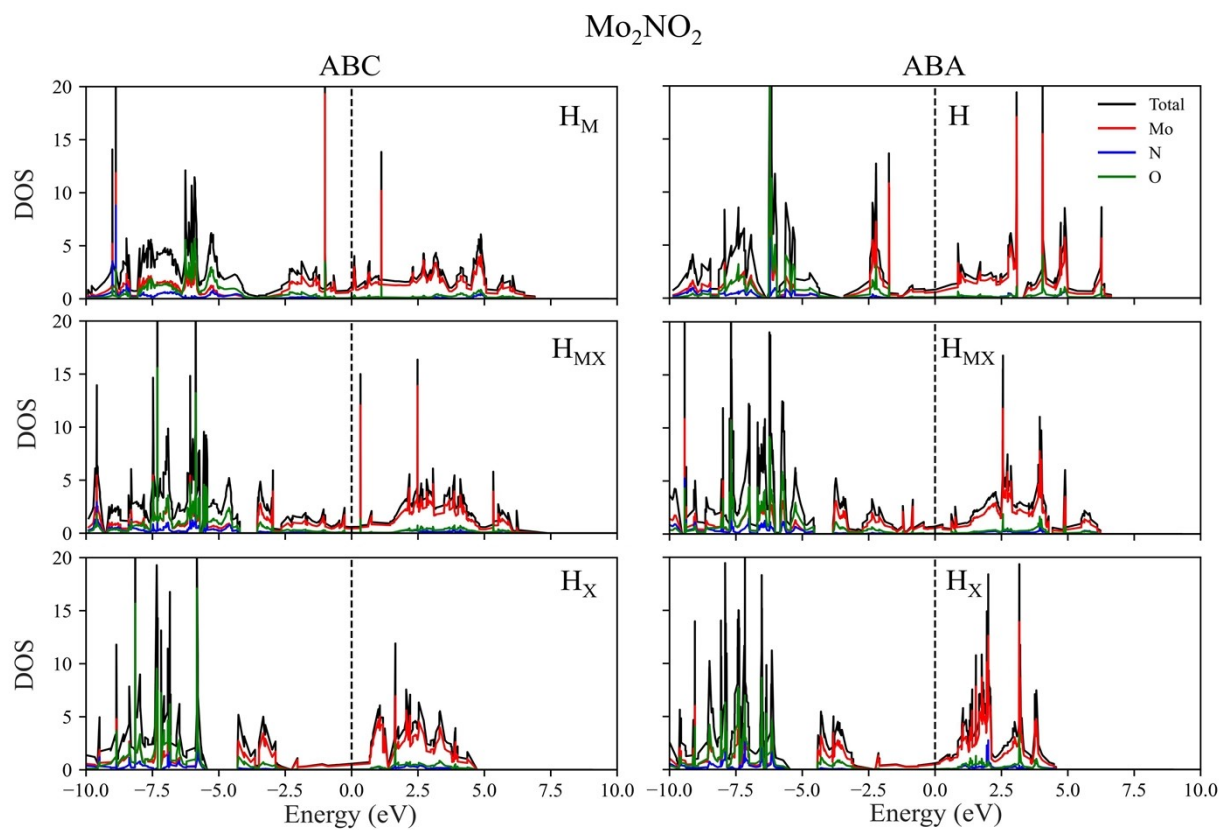



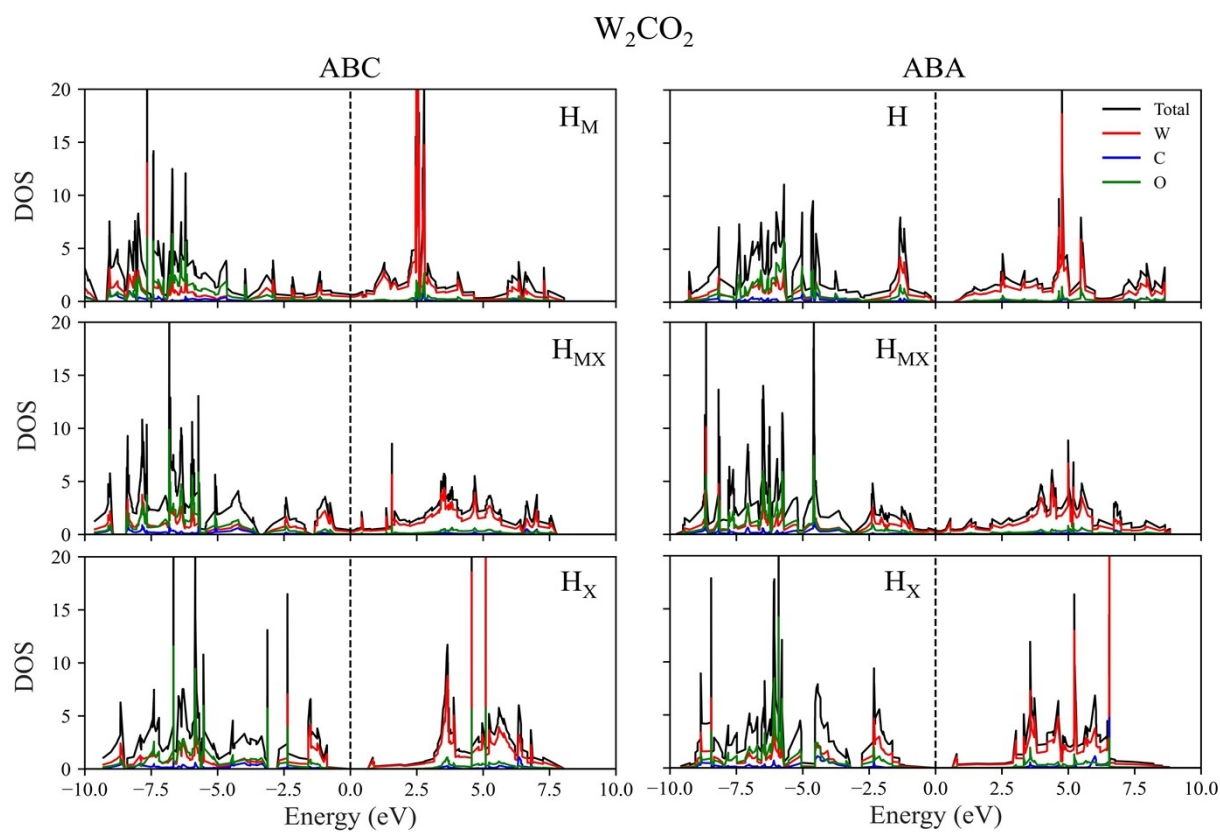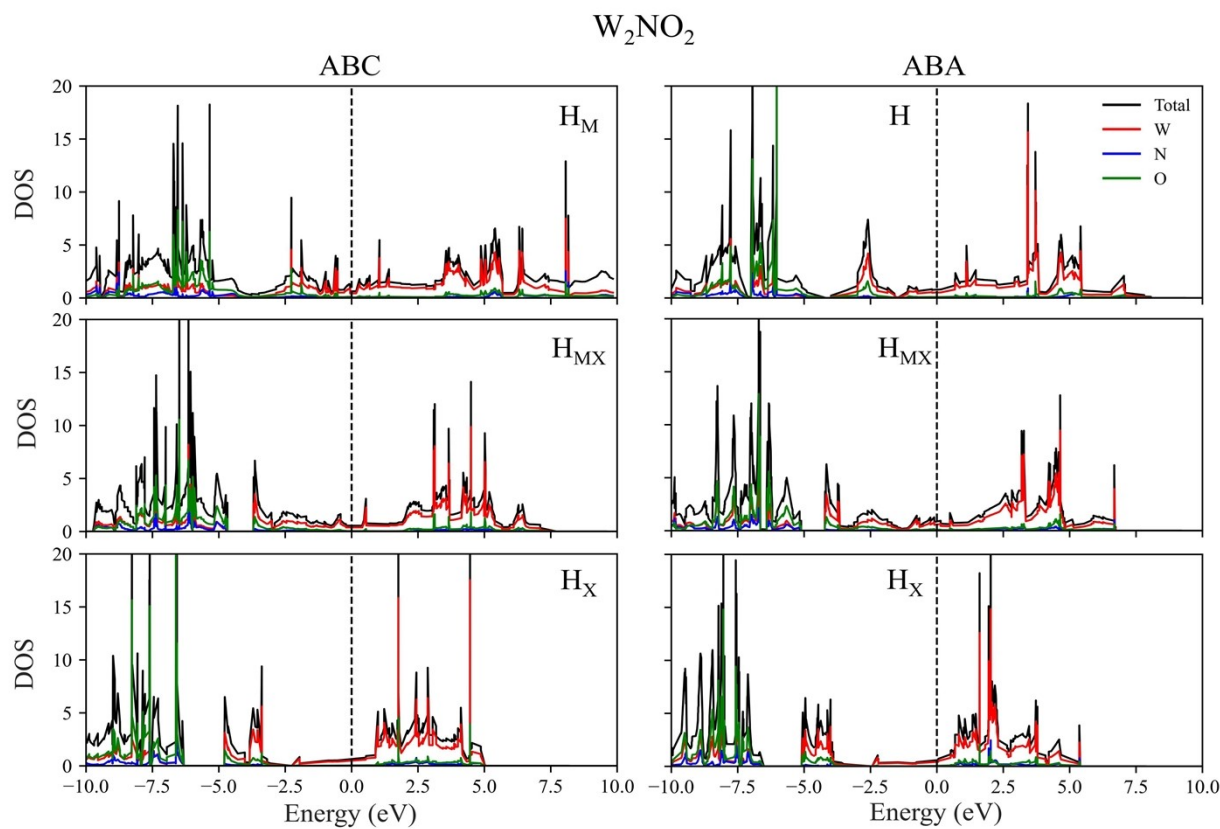

**Fig. S5** Average electrostatic potential,  $V$ , in eV, as a function of  $z$  coordinate along the vacuum direction, in Å, for the  $\text{Zr}_2\text{CO}_2$  ABC  $\text{H}_M$  system. The vacuum energy,  $V_v$ , is indicated as the red dashed line.

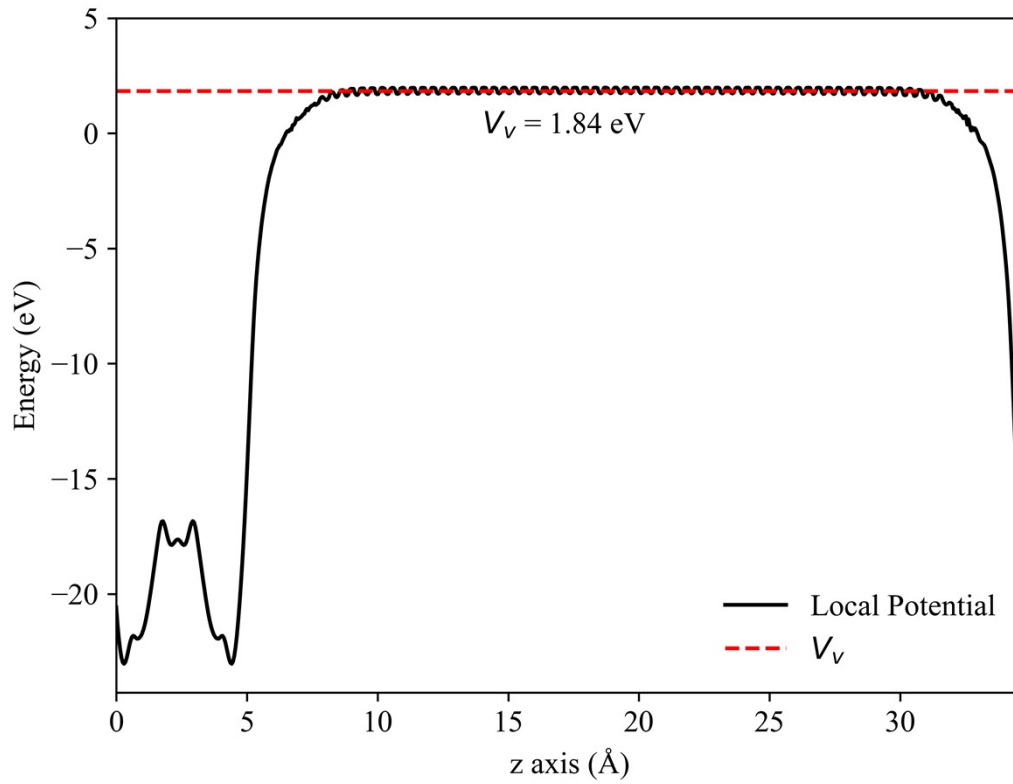

**Fig. S6** Relation between the absolute surface dipole moment,  $P$ , and the workfunction,  $\phi$ , for the Group III N-MXenes. On the right are present the colour coded linear regression equations.

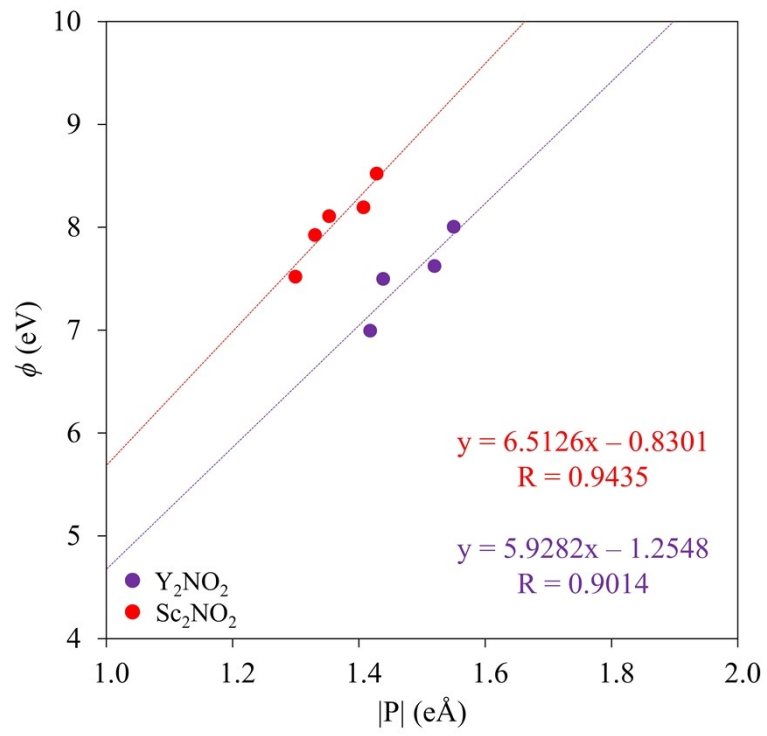

**Fig. S7** Comparison of (a), (c) PBE and (b), (d) PBE0 bandstructures for  $\text{Sc}_2\text{CO}_2$  and  $\text{Y}_2\text{CO}_2$ , respectively, computed on the most stable structure, ABC  $\text{H}_{\text{MX}}$ . Energy levels are referred to the VBM level.

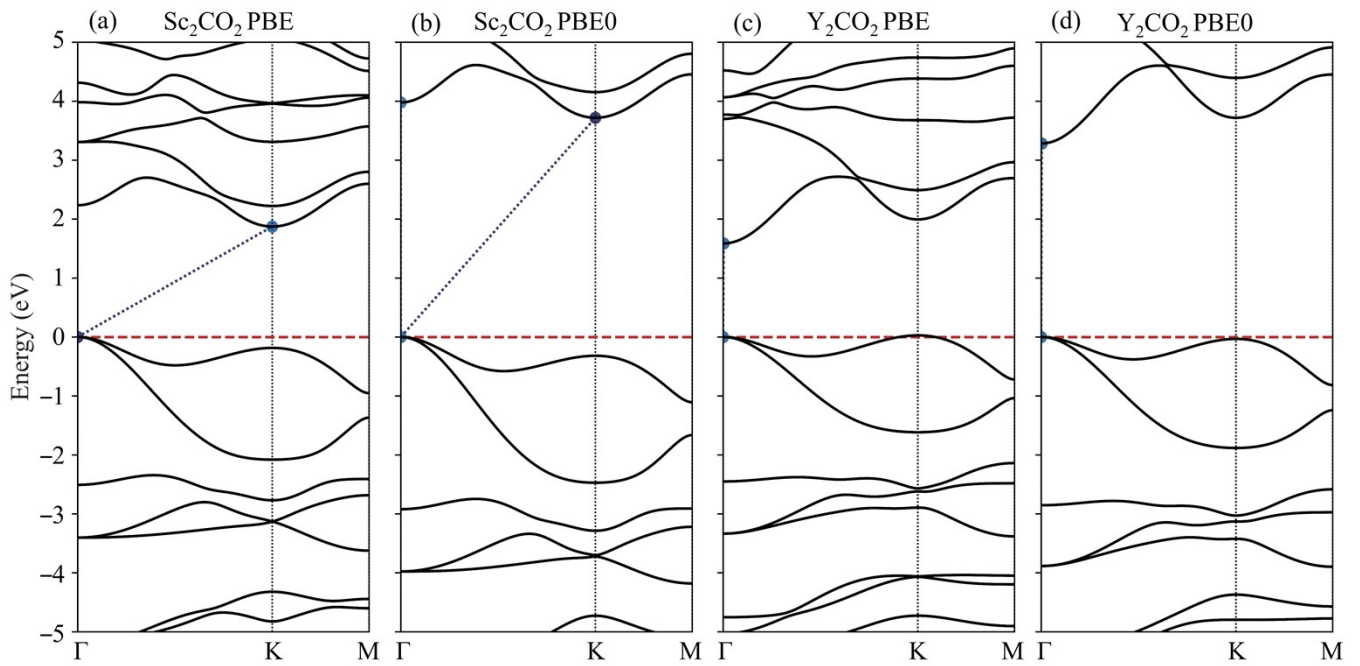

Supplement: d3ta01933k1.pdf [file d3ta01933k1.pdf]
